1  
2  
3  
4  
5  
6  
7  
8  
9  
10  
11  
12  
13  
14  
15  
16  
17  
18  
19  
20  
21  
22  
23  
24  
25  
26  
27

## Genome-wide association study results for educational attainment aid in identifying genetic heterogeneity of schizophrenia

### ABSTRACT

Higher educational attainment (EA) is negatively associated with schizophrenia (SZ). However, recent studies found a positive genetic correlation between EA and SZ. We investigated possible causes of this counterintuitive finding using genome-wide association study results for EA and SZ ( $N = 443,581$ ) and a replication cohort (1,169 controls; 1,067 cases) with deeply phenotyped SZ patients. We found strong genetic dependence between EA and SZ that cannot be explained by chance, linkage disequilibrium, or assortative mating. Instead, several genes seem to have pleiotropic effects on EA and SZ, but without a clear pattern of sign concordance. Genetic heterogeneity of SZ contributes to this finding. We demonstrate this by showing that the polygenic prediction of clinical SZ symptoms can be improved by taking the sign concordance of loci for EA and SZ into account. Furthermore, using EA as a proxy phenotype, we isolate *FOXO6* and *SLITRK1* as novel candidate genes for SZ.

28 **Authors:** V. Bansal<sup>1,2,3,4</sup>, M. Mitjans<sup>1,2,5</sup>, C.A.P. Burik<sup>6,7,8</sup>, R.K. Linnér<sup>6,7,8</sup>, A. Okbay<sup>6,8</sup>, C.A.  
29 Rietveld<sup>9,7</sup>, M. Begemann<sup>2,10</sup>, S. Bonn<sup>3,4</sup>, S. Ripke<sup>11,12,13</sup>, R. de Vlaming<sup>6,8</sup>,  
30 M.G. Nivard<sup>14,15</sup>, H. Ehrenreich<sup>2,5,15</sup>, P.D. Koellinger<sup>6,7,8,15</sup>

31

32 Affiliations:

- 33 1 These co-authors contributed equally.  
34 2 Clinical Neuroscience, Max Planck Institute of Experimental Medicine, Hermann-Rein-  
35 Straße 3, 37075, Göttingen, Germany  
36 3 Research Group for Computational Systems Biology, German Center for  
37 Neurodegenerative Diseases (DZNE), Von-Siebold-Straße 3A, 37075 Göttingen,  
38 Germany  
39 4 Institute of Medical Systems Biology, Center for Molecular Neurobiology, University  
40 Clinic Hamburg-Eppendorf, Falkenried 94, 20251 Hamburg, Germany  
41 5 DFG Research Center for Nanoscale Microscopy and Molecular Physiology of the Brain  
42 (CNMPB), Humboldtallee 23, 30703, Göttingen, Germany  
43 6 Complex Trait Genetics, Vrije Universiteit Amsterdam, De Boelelaan 1085 B-631, 1081  
44 HV, Amsterdam, Netherlands  
45 7 Institute for Behavior and Biology, Erasmus University Rotterdam, P.O. Box 1738, 3000  
46 DR, Rotterdam, Netherlands  
47 8 School of Business and Economics, Department of Economics, De Boelelaan 1105, 1081  
48 HV, Amsterdam, Netherlands  
49 9 Erasmus School of Economics, Erasmus University Rotterdam, P.O. Box 1738, 3000 DR,  
50 Rotterdam, Netherlands  
51 10 Department of Psychiatry & Psychotherapy, University of Göttingen, Von-Siebold-Straße  
52 5, 37075, Göttingen, Germany  
53 11 Analytic and Translational Genetics Unit, Massachusetts General Hospital, 02114 MA,  
54 Boston, USA  
55 12 Stanley Center for Psychiatric Research, Broad Institute of MIT and Harvard, 02142 MA,  
56 Cambridge, USA  
57 13 Department of Psychiatry and Psychotherapy, Charité-Universitätsmedizin Berlin,  
58 Campus Mitte, Berlin, 10117, Germany  
59 14 Department of Biological Psychology, Vrije Universiteit Amsterdam, van der  
60 Boechorststraat 1, 1081 BT, Amsterdam, Netherlands  
61 15 These authors jointly directed this work.

62

63

64 \* Correspondence: Professor P.D. Koellinger, School of Business and Economics, De  
65 Boelelaan 1105, 1081 HV, Amsterdam, Netherlands, E-mail: [p.d.koellinger@vu.nl](mailto:p.d.koellinger@vu.nl)

66

67 **MAIN TEXT**

68 Schizophrenia (SZ) is the collective term used for a severe, highly heterogeneous and costly  
69 psychiatric disorder that is caused by environmental and genetic factors<sup>1-4</sup>. The latest  
70 genome-wide association study (GWAS) by the Psychiatric Genomics Consortium (PGC)  
71 identified 108 genomic loci that are associated with SZ<sup>5</sup>. These 108 loci jointly account for  
72  $\approx 3.4\%$  of the variation on the liability scale for SZ<sup>5</sup>, while all single nucleotide  
73 polymorphisms (SNPs) that are currently measured by SNP arrays capture  $\approx 64\%$  (s.e. = 8%)  
74 of the variation in liability for the disease<sup>6</sup>. This implies that many genetic variants with small  
75 effect sizes contribute to the heritability of SZ, but most of them are unidentified as of yet. A  
76 polygenic score (PGS) based on all SNPs currently accounts for 4-15% of the variation on the  
77 liability scale for SZ<sup>5</sup>.

78 However, this PGS does not predict any differences in symptoms or severity of the disease  
79 among SZ patients<sup>4</sup>. Partly, this could be because the clinical disease classification of SZ  
80 spans several different behavioural and cognitive traits that may not have identical genetic  
81 architectures. Therefore, identifying additional genetic variants and understanding through  
82 which pathways they are linked with the clinical diagnosis of SZ is an important step in  
83 understanding the aetiologies of the ‘schizophrenias’<sup>7</sup>. However, GWAS analyses of specific  
84 SZ symptoms would require very large sample sizes to be statistically well powered, and the  
85 currently available datasets on deeply phenotyped SZ patients are not yet large enough for  
86 this purpose.

87 Here, we use an alternative approach to make progress with data that is readily available – by  
88 combining GWAS for SZ and educational attainment (EA). The GWAS sample sizes for EA  
89 are the largest to date for any cognition-related phenotype. Furthermore, previous studies  
90 suggest a complex relationship between EA and SZ<sup>8,9</sup> that may be used to gain additional  
91 insights into the genetic architecture of SZ and its symptoms. In particular, phenotypic data  
92 seem to suggest a *negative* correlation between EA and SZ<sup>10</sup>. For example, SZ patients with  
93 lower EA typically show an earlier age of disease onset, higher levels of psychotic  
94 symptomatology, and worsened global cognitive function<sup>10</sup>. In fact, EA has been suggested to  
95 be a measure of premorbid function and a predictor of outcomes in SZ. Moreover, it has been  
96 forcefully argued that retarded intellectual development, global cognitive impairment during  
97 childhood, and bad school performance should be seen as core features of SZ that precede the  
98 development of psychotic symptoms and differentiate SZ from bipolar disorder (BIP)<sup>11-15</sup>.  
99 Furthermore, credible genetic links between SZ and impaired cognitive performance have  
100 been found<sup>16</sup>.

101 In contrast to these findings, recent studies using large-scale GWAS results identified a small,  
102 but *positive genetic* correlation between EA and SZ ( $\rho_{EA,SZ} = 0.08$ )<sup>8</sup>, and higher PGS values  
103 for SZ have been reported to be associated with creativity and greater EA<sup>17</sup>. Other  
104 statistically well-powered studies found that a high intelligence quotient (IQ) has protective  
105 effects against SZ<sup>18</sup> and reported a negative genetic correlation between IQ and SZ ( $\rho_{IQ,SZ} =$   
106  $-0.2$ )<sup>19</sup>, suggesting the possibility that genetic effects that contribute to EA *but not via IQ* are  
107 responsible for the observed positive genetic correlation between SZ and EA.

108 Indeed, the latest GWAS on EA<sup>8</sup> already indicated that genetic influences on higher  
109 schooling are not only mediated by IQ but also by personality factors such as behavioural  
110 inhibition and openness to experience. These different factors that contribute to EA seem to  
111 be related to SZ and its symptoms in complex ways<sup>20-22</sup>. For example, differences in  
112 openness have been reported to differentiate between patients diagnosed with schizophrenia  
113 spectrum personality disorders (higher openness) from patients diagnosed with SZ (lower  
114 openness)<sup>20</sup>. Furthermore, behavioural inhibition has been reported to be more pronounced

115 among SZ patients compared to healthy controls and linked to the severity of negative (but  
116 not positive) symptoms<sup>23,24</sup>.

117 The contributing factors to EA that have been identified so far (i.e. IQ, openness, and  
118 behavioral inhibition)<sup>8</sup> are phenotypically and genetically related, but by no means  
119 identical<sup>25,26</sup>. Therefore, it is appropriate to think of EA as a genetically heterogeneous trait  
120 that can be decomposed into subphenotypes that have imperfect genetic correlations with  
121 each other. If the various symptoms of SZ also have non-identical genetic architectures, this  
122 could result in a pattern where both EA and SZ share many genetic loci, but without a clear  
123 pattern of sign concordance and with seemingly contradictory phenotypic and genetic  
124 correlation results.

125 To explore this hypothesis and to discern it from alternative explanations, we performed a  
126 series of statistical genetic analyses using large-scale GWAS results for SZ and EA from non-  
127 overlapping samples. We started by characterizing the genetic relationship between both  
128 traits by using EA as a “proxy phenotype”<sup>27</sup> for SZ. We annotated possible biological  
129 pathways, tissues, and cell types implied by genetic variants that are associated with both  
130 traits and explored to what extent these variants are also enriched for association with other  
131 traits. We tested if the genetic relationship between EA and SZ can be explained by chance,  
132 linkage disequilibrium (LD), or assortative mating. Furthermore, we investigated the  
133 hypothesis that the part of SZ that is different from BIP is a neurodevelopmental disorder,  
134 whereas the part of SZ that overlaps with BIP is not. Finally, we developed a formal  
135 statistical test for genetic heterogeneity of SZ using a polygenic prediction framework that  
136 leverages both the SZ and the EA GWAS results.

137

## 138 **RESULTS**

139 As a formal prelude to our study, it is conceptually important to differentiate between genetic  
140 dependence and genetic correlation. In our analyses, genetic dependence means that the  
141 genetic variants associated with EA are more likely to also be associated with SZ than  
142 expected by chance. In contrast, genetic correlation is defined by the correlation of the (true)  
143 effect sizes of genetic variants on the two traits. Thus, genetic correlation implies a linear  
144 genetic relationship between two traits whereas genetic dependence does not. Thus, two traits  
145 can be genetically dependent even if they are not genetically correlated and *vice versa*. One  
146 possible cause of a non-linear genetic dependence is that at least one of the traits is  
147 genetically heterogeneous in the sense that it aggregates across subphenotypes (or symptoms)  
148 with non-identical genetic architectures. **Supplementary Note 1** presents a more formal  
149 discussion and simulations that illustrate the data patterns that can emerge.

### 150 **Proxy-phenotype analyses**

151 We used the proxy-phenotype method (PPM)<sup>27</sup> to illustrate the genetic dependence between  
152 EA and SZ. PPM is a two-stage approach. In the first stage, a GWAS on the proxy-phenotype  
153 (EA) is conducted. The most strongly associated loci are then advanced to the second stage,  
154 which tests the association of these loci with the phenotype of interest (SZ) in an independent  
155 sample. If the two traits are genetically dependent, this two-stage approach can increase the  
156 statistical power for detecting associations for the target trait because it limits the multiple  
157 testing burden for the phenotype of interest compared to a GWAS<sup>8,9,27</sup>.

158 Our PPM analyses followed a preregistered analysis plan (<https://osf.io/dnhfk/>) using GWAS  
159 results on EA ( $n = 363,502$ )<sup>8</sup> and SZ (34,409 cases and 45,670 controls)<sup>28</sup> that were obtained  
160 from non-overlapping samples of Europeans. For replication and follow-up analyses, we used  
161 the Göttingen Research Association for Schizophrenia (GRAS) data collection<sup>29</sup>, which has a

162 uniquely rich and accurate set of SZ measures. The GRAS sample was not part of either  
163 GWAS (**Supplementary Notes 2-3**).

164 Analyses were performed using 8,240,280 autosomal SNPs that passed quality controls in  
165 both GWAS and additional filters described in Methods and **Supplementary Note 4**. We  
166 selected approximately independent lead SNPs from the EA GWAS that passed the  
167 predefined significance threshold of  $P_{EA} < 10^{-5}$  and looked up their SZ results. To test if  
168 EA-associated SNPs are more strongly associated with SZ than expected by chance (referred  
169 to as “raw enrichment” below), we conducted a Mann-Whitney test that compares the  $P_{SZ}$ -  
170 values of the EA-associated lead SNPs with the  $P_{SZ}$ -values of a set of randomly drawn,  
171 approximately LD-independent SNPs with similar minor allele frequencies (**Supplementary**  
172 **Notes 5-6**). Fig. 1 presents an overview of the proxy-phenotype analyses.

173 The first-stage GWAS on EA (**Supplementary Note 2**) identified 506 loci that passed our  
174 predefined threshold of  $P_{EA} < 10^{-5}$ ; 108 of them were significant at the genome-wide level  
175 ( $P_{EA} < 5 \times 10^{-8}$ , see **Supplementary Table 2**). Of the 506 EA lead-SNPs, 132 are  
176 associated with SZ at nominal significance ( $P_{SZ} < 0.05$ ), and 21 of these survive Bonferroni  
177 correction ( $P_{SZ} < \frac{0.05}{506} = 9.88 \times 10^{-5}$ ) (**Table 1**). LD score regression results suggest that the  
178 vast majority of the association signal in both the EA<sup>8</sup> and the SZ<sup>5</sup> GWAS are truly genetic  
179 signals, rather than spurious signals originating from uncontrolled population stratification.  
180 **Figure 2a** shows a Manhattan plot for the GWAS on EA highlighting SNPs that were also  
181 significantly associated with SZ (turquoise crosses for  $P_{SZ} < 0.05$ , magenta crosses for  
182  $P_{SZ} = 9.88 \times 10^{-5}$ ).

183 A Q-Q plot of the 506 EA lead SNPs for SZ is shown in **Figure 2b**. Although the observed  
184 sign concordance of 52% is not significantly different from a random pattern ( $P = 0.40$ ), we  
185 find 3.23 times more SNPs in this set of 506 SNPs that are nominally significant for SZ than  
186 expected given the distribution of the  $P$  values in the SZ GWAS results (raw enrichment  
187  $P = 6.87 \times 10^{-10}$ , **Supplementary Note 6**). The observed enrichment of the 21 EA lead  
188 SNPs that pass Bonferroni correction for SZ ( $P_{SZ} < \frac{0.05}{506} = 9.88 \times 10^{-5}$ ) is even more  
189 pronounced (27 times stronger,  $P = 5.44 \times 10^{-14}$ ).

190 The effect sizes of these 21 SNPs on SZ are small, ranging from  $Odds = 1.02$  (rs4500960) to  
191  $Odds = 1.11$  (rs4378243) after correction for the statistical winner’s curse<sup>27</sup> (**Table 1**). We  
192 calculated the probability that these 21 SNPs are truly associated with SZ using a heuristic  
193 Bayesian method that takes the winner’s curse corrected effect sizes, statistical power, and  
194 prior beliefs into account<sup>27</sup>. Applying a reasonable prior belief of 5% (**Supplementary Note**  
195 **6**), we find that all 21 SNPs are likely or almost certain to be true positives.

### 196 **Prediction of future genome-wide significant loci for schizophrenia**

197 Of the 21 variants we identified, 12 are in LD with loci previously reported by the PGC<sup>5</sup> and  
198 2 are in the major histocompatibility complex region on chromosome (chr) 6 and were  
199 therefore not separately reported in that study. Three of the variants we isolated (rs7610856,  
200 rs143283559, and rs28360516) were independently found in a recent meta-analysis of the  
201 PGC results<sup>5</sup> with another large-scale sample<sup>30</sup>. We show in **Supplementary Note 6** that  
202 using EA as a proxy-phenotype for SZ helped to predict the novel genome-wide significant  
203 findings reported in that study, which illustrates the power of the proxy-phenotype approach.  
204 Furthermore, two of the 21 variants (rs756912, rs7593947) are in LD with loci recently  
205 reported in a study that also compared GWAS findings from EA and SZ using smaller  
206 samples and a less conservative statistical approach<sup>31</sup>. The remaining 2 SNPs we identified

207 (rs7336518 on chr13 and rs7522116 on chr1) add to the list of empirically plausible candidate  
208 loci for SZ.

### 209 **Detection of shared causal loci**

210 The next step in our study was a series of analyses that aimed to identify reasons for the  
211 observed genetic dependence between EA and SZ and to put the findings of the PPM analysis  
212 into context. First, we probed if there is evidence that the loci identified by the PPM may tag  
213 shared causal loci for both EA and SZ (i.e., pleiotropy), rather than being in LD with different  
214 causal loci for both traits.

215 For each of the 21 SNPs isolated by our PPM analysis, we looked at their neighbouring SNPs  
216 within a +/- 500 kb window and estimated their posterior probability of being causal for EA  
217 or SZ using PAINTOR<sup>32</sup>. We then selected two sets of SNPs, each of which contains the  
218 smallest number of SNPs that yields a cumulative posterior probability of 90% of containing  
219 the causal locus for EA and SZ. For each of these sets, we calculated the posterior probability  
220 that it contains the causal locus for the other trait. We classified the probability of a locus  
221 being pleiotropic as low (0-15%), medium (15-45%), or high (>45%) (**Supplementary Note**  
222 **7**).

223 For eight loci, the credible set had a medium or high credibility to have direct causal effects  
224 on both EA and SZ (including one of the novel SNPs, rs7336518). Five of these loci have  
225 concordant effects on the two traits (i.e., ++ or --) while three have a discordant effects (i.e.,  
226 +- or -+, **Supplementary Note 7**). We recognize that a second metric of importance in this  
227 analysis is the size of the credible set – a single SNP with a high probability of being a causal  
228 SNP for both traits (say 30%) may be stronger evidence of a shared a causal signal than a  
229 large set of SNPs (say several hundred) that have a higher probability (say 65%) of  
230 containing a causal locus for both traits.

231 For most loci we investigated, the 90% credibility sets are > 100 SNPs, and the 65%  
232 credibility sets are > 25 SNPs (**Supplementary Table 3**). The size of the sets indicates the  
233 limits of statistical fine-mapping. Further progress would require a different approach such as  
234 cross-ethnic or experimental fine-mapping or analysis of sequence data in families. However,  
235 one locus (rs7336518) has medium credibility and a small credibility set (18 SNPs for EA  
236 and 2 SNPs for SZ), which makes it a reasonable candidate for having direct pleiotropic  
237 effects on both traits.

### 238 **Biological annotations**

239 Biological annotation of the 132 SNPs that are jointly associated with EA ( $P_{EA} < 10^{-5}$ ) and  
240 SZ ( $P_{SZ} < 0.05$ ) using DEPICT identified 111 significant reconstituted gene sets  
241 (**Supplementary Table 4.1**). Pruning these resulted in 19 representative gene sets, including  
242 dendrites, axon guidance, transmission across chemical synapses, and abnormal cerebral  
243 cortex morphology (**Supplementary Table 4.2** and **Supplementary Fig. 3a**). All  
244 significantly enriched tissues are related to the nervous system and sense organs  
245 (**Supplementary Fig. 3b**). Furthermore, “Neural Stem Cells” is the only significantly  
246 enriched cell type (**Supplementary Table 4.3**). DEPICT prioritized genes that are known to  
247 be involved in neurogenesis and synapse formation (**Supplementary Table 4.4**). Some of the  
248 genes, including *SEMA6D* and *CSPG5*, have been suggested to play a potential role in  
249 SZ<sup>33,34</sup>. For the two novel candidate SNPs reported in this study (rs7522116 and rs7336518),  
250 DEPICT points to the *FOXO6* (Forkhead Box O6) and the *SLITRK1* (SLIT and NTRK Like  
251 Family Member 1) genes, respectively. *FOXO6* is predominantly expressed in the  
252 hippocampus and has been suggested to be involved in memory consolidation, emotion and  
253 synaptic function<sup>35,36</sup>. Similarly, *SLITRK1* is also highly expressed in the brain<sup>37</sup>, is

254 particularly localized to excitatory synapses and promotes their development<sup>38</sup>, and it has  
255 previously been suggested to be a candidate gene for neuropsychiatric disorders<sup>39</sup>.

## 256 **LD-aware enrichment across different traits**

257 To probe if the observed genetic dependence between EA and SZ can be entirely explained  
258 by LD patterns in the human genome, we developed an association enrichment test that  
259 corrects for the LD score of each SNP (**Supplementary Note 9**). We applied this test to the  
260 132 SNPs that are jointly associated with EA ( $P_{EA} < 10^{-5}$ ) and SZ ( $P_{SZ} < 0.05$ ). LD scores  
261 were obtained from the HapMap 3 European reference panel<sup>40</sup>. Furthermore, we used this test  
262 to explore if these SNPs are generally enriched for association with all (brain-related)  
263 phenotypes, or whether they exhibit some degree of outcome-specificity. For this purpose, we  
264 extended the LD-aware enrichment test to 21 additional traits for which GWAS results were  
265 available in the public domain. Some of the traits were chosen because they are  
266 phenotypically related to SZ (e.g., neuroticism, depressive symptoms, major depressive  
267 disorder, autism, and childhood IQ), while others were less obviously related to SZ (e.g., age  
268 at menarche, intracranial volume, cigarettes per day) or served as negative controls (height,  
269 birth weight, birth length, fasting (pro)insulin).

270 **Supplementary Fig. 4** and **Supplementary Table 5.1** show the LD-aware enrichment of the  
271 SNPs that are jointly associated with EA and SZ across traits. First, we found significant joint  
272 LD-aware enrichment for SZ, further confirming that the genetic dependence between EA  
273 and SZ cannot be entirely explained by LD. We also found LD-aware enrichment for BIP,  
274 neuroticism, childhood IQ, and age at menarche. However, we found no LD-aware  
275 enrichment for other brain-traits that are phenotypically related to SZ, such as depressive  
276 symptoms, subjective well-being, autism, and attention deficit hyperactivity disorder. We  
277 also did not find LD-aware enrichment for most traits that are less obviously related to the  
278 brain and our negative controls. Furthermore, one of the novel SNPs we isolated shows  
279 significant LD-aware enrichment both for SZ and for BIP (rs7522116). The results suggest  
280 that the loci identified by the PPM are not simply related to all (brain) traits. Instead, they  
281 show some degree of phenotype specificity.

## 282 **Replication in the GRAS sample**

283 Our replication sample, the GRAS data collection, is described in **Supplementary Note 10**.  
284 Following our preregistered analysis plan (<https://osf.io/dnhfk/>), our replication of the PPM  
285 analysis results uses a PGS that is based on the 132 independent EA lead SNPs that are also  
286 nominally associated with SZ ( $P_{EA} < 10^{-5}$  and  $P_{SZ} < 0.05$ , **Supplementary Note 11**). This  
287 PGS ( $SZ_{132}$ ) adds  $\Delta R^2 = 7.54\% - 7.01\% = 0.53\%$  predictive accuracy for SZ case-  
288 control status to a PGS ( $SZ_{all}$ ) derived from the GWAS on SZ alone ( $P = 1.7 \times 10^{-4}$ ,  
289 **Supplementary Table 7.2.a**, Model 3). The  $SZ_{132}$  score also significantly adds ( $P = 3.4 \times$   
290  $10^{-4}$ ) to the predictive accuracy of SZ case-control status when all other scores we  
291 constructed are included as control variables (**Supplementary Table 7.2.a**, Model 9).

## 292 **Prediction of schizophrenia measures in the GRAS patient sample**

293 To explore the genetic architecture of specific SZ measures, we again used our replication  
294 sample (GRAS), which contains exceptionally detailed measures of SZ symptoms, severity,  
295 and disease history<sup>4,7,29</sup>. We focused on years of education, age at prodrome, age at disease  
296 onset, premorbid IQ (approximated by a multiple-choice vocabulary test), global assessment  
297 of functioning (GAF), the clinical global impression of severity (CGI-S), as well as positive  
298 and negative symptoms (PANSS positive and negative, respectively) among SZ patients ( $N$   
299 ranges from 903 to 1,039, see **Supplementary Notes 10 and 12**). Consistent with the idea  
300 that EA is a predictor of SZ measures, our phenotypic correlations show that higher education

301 is associated with later age at prodrome, later onset of disease, and less severe disease  
302 symptoms among SZ patients (**Supplementary Note 12, Supplementary Table 8.1 and**  
303 **Supplementary Fig. 5**).

304 Our most direct test for genetic heterogeneity of SZ is based on PGS analyses that we  
305 performed using the detailed SZ measures among GRAS patients. If SZ is genetically  
306 heterogeneous, there is potentially relevant information in the sign concordance of individual  
307 SNPs with EA traits that may improve the prediction of symptoms (see **Supplementary Note**  
308 **1** for formal derivations). We use a simple method to do this here: First, we construct a PGS  
309 for SZ that contains one SNP per LD-block that is most strongly associated with SZ. Overall,  
310 this score (*SZ\_all*) contains 349,357 approximately LD-independent SNPs. Next, we split  
311 *SZ\_all* into two scores, based on sign-concordance of the SNPs with SZ and EA. More  
312 specifically, one score contains all estimated SZ effects of SNPs that have concordant signs  
313 for both traits (174,734 SNPs with ++ or -- on both traits, *Concordant*) while the other  
314 contains the estimated SZ effects of the remaining SNPs with discordant effects (174,623  
315 SNPs with +- or -+, *Discordant*). Note that splitting the *SZ\_all* score this way is not expected  
316 to improve the prediction of symptoms if they share the same genetic architecture (i.e., if SZ  
317 was a genetically homogenous trait). We test this null hypothesis with an *F*-test that  
318 compares the predictive performance of models that include (i) the *SZ\_all* and the EA score  
319 (*EA\_all*) and (ii) the *Concordant*, *Discordant*, and *EA\_all* scores (**Supplementary Note**  
320 **1.3.2**). We also compare the performance of both of these models to a baseline that only  
321 includes the *SZ\_all* score as a relevant predictor.

322 We found that the *EA\_all* PGS is associated with years of education ( $P = 1.0 \times 10^{-6}$ ) and  
323 premorbid IQ ( $P = 2.7 \times 10^{-4}$ ) among SZ patients (**Supplementary Note 12 and Table 2**).  
324 Consistent with earlier results<sup>4</sup>, we also found that none of the SZ measures can be predicted  
325 by the PGS for SZ (*SZ\_all*, **Table 2**). However, splitting the PGS for SZ based on the sign-  
326 concordance of SNPs with EA (*Concordant* and *Discordant*) increased predictive accuracy  
327 significantly for severity of disease (GAF ( $p_F = 0.023$ )) and symptoms (PANSS negative ( $p_F$   
328 = 0.007)) (**Table 2**). This increase in predictive accuracy is evidence for genetic  
329 heterogeneity of SZ (**Supplementary Note 1**). Specifically, our results indicate that SZ  
330 patients with a high genetic propensity for EA have better GAFs and less severe negative  
331 symptoms (PANSS negative). However, if the high genetic predisposition for EA is primarily  
332 due to loci that also increase the risk for SZ (i.e., high values on the *Concordant* score), this  
333 protective effect is attenuated. We repeated these analyses excluding patients who were  
334 diagnosed with schizoaffective disorder (SD,  $N = 198$ ) and found similar results, implying  
335 that our findings are not only due to the presence of patients with SD (**Supplementary Note**  
336 **12, Supplementary Table 8.4.a**).

337 We note that this implementation of our test for heterogeneity of SZ (**Supplementary Note**  
338 **1**) is based on a conservative pruning algorithm that controls for LD both within and across  
339 the *Concordant* and *Discordant* scores. This limits the number of genetic markers in both of  
340 these scores, their expected predictive accuracy, and the power of the test. As an alternative,  
341 we also used a less conservative approach that only prunes for LD within scores, yielding  
342 260,441 concordant and 261,062 discordant SNPs (**Supplementary Note 11.1.1**). Split  
343 scores based on this extended set of SNPs have higher predictive accuracy for all the SZ  
344 measures that we analysed (**Supplementary Table 8.7**), reaching  $\Delta R^2 = 1.12\%$  ( $p_F = 0.0004$ )  
345 for PANSS negative.

346 Finally, we show that randomly splitting the *SZ\_all* score does not yield any gains in  
347 predictive accuracy (**Supplementary Note 12 and Supplementary Table 8.5**).

348



## 349 **Controlling for the genetic overlap between schizophrenia and bipolar disorder**

350 The ongoing debate about what constitutes the difference between SZ and BIP<sup>11-15</sup> suggests  
351 an additional possibility to test for genetic heterogeneity among SZ cases. While SZ and BIP  
352 share psychotic symptoms such as hallucinations and delusions, scholars have argued that SZ  
353 should be perceived as a neurodevelopmental disorder in which cognitive deficits precede the  
354 development of psychotic symptoms, while this is not the case for BIP<sup>11-15</sup>. However,  
355 cognitive deficits during adolescence are currently not a diagnostic criterion that formally  
356 differentiates SZ from BIP. As a result, many patients who are formally diagnosed with SZ  
357 did not suffer from cognitive impairments in their adolescent years, but their disease  
358 aetiology may be different from those who do. These differences in disease aetiology may be  
359 visible in how the non-shared part of the genetic architecture of SZ and BIP is related to  
360 measures of cognition, such as EA and childhood IQ.

361 We tested this by using genome-wide inferred statistics (GWIS)<sup>41</sup> to obtain GWAS regression  
362 coefficients and standard errors for SZ that are “purged” of their genetic correlation with BIP  
363 and *vice versa* (yielding “unique” SZ<sub>(min BIP)</sub> and “unique” BIP<sub>(min SZ)</sub> results, respectively).  
364 We then computed genetic correlations of these GWIS results with EA, childhood IQ, and (as  
365 a non-cognitive control trait) neuroticism using bivariate LD score regression<sup>42</sup> and compared  
366 the results to those obtained using ordinary SZ and BIP GWAS results (**Supplementary Note**  
367 **13**).

368 In line with earlier findings<sup>8,42</sup>, we see a positive genetic correlation of ordinary SZ and BIP  
369 with EA. However, the genetic correlations between “unique” SZ<sub>(min BIP)</sub> with EA and  
370 childhood IQ are negative and significant ( $r_g = -0.16$ ,  $P = 3.88 \times 10^{-04}$  and  $r_g = -0.31$ ,  $P =$   
371  $6.00 \times 10^{-03}$ , respectively), while the genetic correlation of “unique” BIP<sub>(min SZ)</sub> with EA and IQ  
372 remain positive ( $r_g \approx 0.3$ ) (**Fig. 3, Supplementary Table 9.2**). Thus, the slightly positive  
373 genetic correlation between SZ and EA<sup>8,42</sup> can be entirely attributed to the genetic overlap  
374 between SZ and BIP<sup>41</sup>. Overall, these results add to the impression that current clinical  
375 diagnoses of SZ aggregate over various non-identical disease aetiologies.

## 376 **Simulations of assortative mating**

377 As a final test, we conducted simulations to explore if strong assortative mating of two traits  
378 can induce a spurious genetic dependence between them that resembles the patterns we see in  
379 our data (**Supplementary Note 14**). The results of these simulations suggest it is unlikely  
380 that assortative mating is a major cause of the genetic dependence between EA and SZ  
381 (**Supplementary Fig. 7**).

382

## 383 **DISCUSSION**

384 We explored the genetic relationship between EA and SZ using large, non-overlapping  
385 GWAS samples. Our results show that EA-associated SNPs are much more likely to be  
386 associated with SZ than expected by chance, i.e., both traits are genetically dependent. Loci  
387 that are jointly associated with EA and SZ are also enriched for association with BIP,  
388 neuroticism, and childhood IQ, but not for other SZ-related phenotypes such as depressive  
389 symptoms, ADHD, or autism, or negative controls such as body height. Thus, these loci show  
390 some degree of phenotype specificity. Overall, we isolated 21 genetic loci that are credibly  
391 associated with SZ by using EA as a proxy-phenotype, including two novel candidate genes,  
392 *FOXO6* and *SLITRK1*. Furthermore, we showed that EA GWAS results help to predict future  
393 GWAS findings for SZ in even larger samples.

394 Biological annotation of a broader set of SNPs that are jointly associated with EA ( $P_{EA} <$   
395  $10^{-5}$ ) and SZ ( $P_{SZ} < 0.05$ ) points to neurogenesis and synapse formation as potentially  
396 important pathways that may influence both traits.

397 However, the genetic loci that are associated with both traits do not follow a systematic sign  
398 pattern that would correspond to a strong positive or negative genetic correlation. Our follow-  
399 up analyses demonstrated that this pattern of strong genetic dependence but weak genetic  
400 correlation between EA and SZ cannot be fully explained by LD or assortative mating.

401 Instead, our results are most consistent with the idea that EA and SZ are both genetically  
402 heterogeneous traits that aggregate over various subphenotypes or symptoms with non-  
403 identical genetic architectures. Specifically, our results suggest that current SZ diagnoses  
404 aggregate over at least two disease subtypes: One part resembles BIP and high IQ (possibly  
405 associated with *Concordant* SNPs), while the other part is a cognitive disorder that is  
406 independent of BIP (possibly influenced by *Discordant* SNPs). This latter subtype bears  
407 similarity with Kraepelin's description of dementia praecox<sup>12</sup>. Overall, our pattern of results  
408 resonates with the idea that cognitive deficits in early life may be an important differentiating  
409 factor between patients with BIP versus SZ psychosis.

410 Moreover, splitting the PGS for SZ into two scores based on the sign concordance of SNPs  
411 with EA enables the prediction of disease symptoms and severity from genetic data for the  
412 first time to some extent. We showed that this result is not driven by patients with SD and it  
413 cannot be repeated by randomly splitting the SZ score. Obviously, further replication of our  
414 results in other samples with high-quality SZ measures would be highly desirable.

415 The many sign-concordant loci that increase the risk for SZ but also improve the chance for  
416 higher education point to possible side-effects of pharmacological interventions that may aim  
417 to target biological pathways that are implicated by pleiotropic loci. Indeed, exploring  
418 pleiotropic patterns of disease-associated genes across a broad range of phenotypes  
419 (including social-scientific ones such as EA or subjective well-being<sup>43</sup>) may be a viable  
420 strategy to identify possible side-effects of new pharmacological products at early stages of  
421 drug development in the future.

422 Although the complexity of SZ remains astonishing, our study contributes to unravelling this  
423 complexity by starting at a genetic level of analysis using well-powered GWAS results. Our  
424 results provide some hope that a psychiatric nosology that is based on biological causes rather  
425 than pure phenotypical classifications may be feasible in the future. Studies that combine  
426 well-powered GWASs of several diseases and from phenotypes that represent variation in the  
427 normal range such as EA are likely to play an important part in this development. However,  
428 deep phenotyping of large patient samples will be necessary to link GWAS results from  
429 complex outcomes such as EA and SZ to specific biological disease subgroups.

430

## 431 **METHODS**

432 A full description of all methods, materials, and results is available in the **Supplementary**  
433 **Notes**.

## 434 **GWAS**

435 We obtained GWAS summary statistics on EA from the Social Science Genetic Association  
436 Consortium (**SSGAC**). The results are based on Okbay et al.<sup>8</sup>, including the UK Biobank. The  
437 PGC shared GWAS summary statistics on SZ with us that were reported in Ripke et al.<sup>5</sup>, but  
438 excluded data from our replication sample (GRAS, see **Supplementary Note 10**), yielding a  
439 total sample size of  $n = 34,409$  cases and  $n = 45,670$  controls. All cohorts that were part of

440 both studies<sup>5,8</sup> were excluded from the meta-analysis on EA, yielding non-overlapping  
441 GWAS samples and  $n_{EA} = 363,502$ . The original EA results file contained 12,299,530 genetic  
442 markers, compared to 17,221,718 in the SZ results file. We applied additional quality control  
443 steps: First, we excluded SNPs that were missing from large parts of both samples. Second,  
444 we excluded SNPs that were not available in both GWAS results files. Third, we excluded  
445 SNPs with non-standard alleles, mismatching effective alleles, and SNPs that exhibited  
446 strong differences in minor allele frequency in both results files. The remaining 8,240,280  
447 autosomal SNPs were used in the proxy-phenotype and prediction analyses.

#### 448 **Proxy-phenotype method (PPM)**

449 We conducted proxy-phenotype analyses following a preregistered analysis plan  
450 (<https://osf.io/dnhfk/>), which specified that we would look up SZ results only for  
451 approximately independent SNPs with  $P_{EA} < 10^{-5}$  in the independent EA sample. For LD-  
452 pruning in the EA GWAS results, we applied the clumping procedure in PLINK version  
453 1.9<sup>44,45</sup> using  $r^2 > 0.1$ , a window of 1,000,000 kb, and the 1000 Genomes phase 1 version 3  
454 European reference panel<sup>46</sup>.

#### 455 **Biological annotations**

456 To gain insights into possible biological pathways that are indicated by the PPM results, we  
457 applied DEPICT<sup>8,47</sup> using a false discovery rate threshold of  $\leq 0.05$ . To identify independent  
458 biological groupings, we used the affinity propagation method based on the Pearson distance  
459 matrix for clustering<sup>48</sup> (**Supplementary Note 8**).

#### 460 **LD-aware enrichment of PPM results across different traits**

461 For SNP  $i$  in trait  $j$ , we calculate the expected chi-square statistic as

$$E[Z_{ij}^2] = (N_j \times h_j^2 \times LDscore_i/M) + (1 + Na)_j$$

462 where  $N$  is the sample size of the target trait  $j$ ,  $h^2$  is the heritability of trait  $j$ ,  $LDscore_i =$   
463  $\sum_{k=1}^M r_{ik}^2$  for SNP  $i$  is calculated using HapMap3 SNPs from European ancestry,  $M$  is the  
464 number of SNPs included in the calculation of the LD score ( $n = 1,173,569$  SNPs),  $r_{jk}^2$  is the  
465 squared correlation between SNPs  $j$  and  $k$  in the HapMap3 reference panel, and  $1 + Na$  is the  
466 LD score regression intercept for trait  $j$ . We calculated the LD score regression intercept and  
467 slope of the traits ( $h^2$ ) using LDSC<sup>49</sup>.

468 To determine whether a particular realization is significantly larger than expected (and thus  
469 the ratio  $Chi_{observed}^2/Chi_{expected}^2$  is significantly greater than one), we tested each particular  
470 observed  $Z$ -statistic (the square root of the  $Chi^2$ ) for SNP  $j$  against a normal distribution with  
471 variance  $(N_j \times h_j^2 \times LDscore_i/M) + (1 + Na)_j$ .

#### 472 **Replication of PPM results**

473 We showed in our preregistered analysis plan that our replication sample (GRAS) is not large  
474 enough to replicate individual SNPs (<https://osf.io/dnhfk/>). Instead, we decided at the outset  
475 to attempt replication of the proxy-phenotype analysis results using a PGS that consists of the  
476  $>80$  most strongly associated, independent SNPs. The set that best meets this criterion are the  
477 132 independent EA lead SNPs that are also nominally associated with SZ ( $P_{SZ} < 0.05$ ), see  
478 **Supplementary Note 6**. The PGS for this set of 132 candidate SNPs ( $SZ_{132}$ ) was  
479 constructed in PLINK version 1.9<sup>44,45</sup> using the  $\beta$  coefficient estimates of the SZ GWAS  
480 meta-analysis.

481

482 **GWIS schizophrenia – bipolar disorder**

483 To infer a SNP's effect on SZ conditioned upon its effect on BIP, we approximated the  
484 following linear regression function:

485

$$SZ = \beta * BIP + e$$

486

487 where the parameter  $\beta$  is estimated from the genetic covariance between SZ and BIP and the  
488 genetic variance in BIP as  $\beta = \frac{cov_g(SZ,BIP)}{var_g(BIP)}$ . The residual ( $e$ ) is actually our trait of interest,

489 for which we use the term  $SZ_{(\min BIP)}$ . Using GWIS<sup>41</sup>, we inferred the genome-wide summary  
490 statistics for  $SZ_{(\min BIP)}$  given the most recent PGC GWAS results for SZ (omitting the GRAS  
491 data collection)<sup>5</sup> and BIP<sup>50</sup>. The effect size with respect to  $SZ_{(\min BIP)}$  for a single SNP is  
492 computed as:

493

$$eff_{sz} - \beta * eff_{BIP} = eff_e$$

494

495 The standard error for each SNP effect is approximated using the delta method and accounts  
496 for the possible effect of sample overlap between the SZ and BIP GWAS.

497 As data input, we used the GWAS results on SZ (excluding the GRAS data collection)  
498 described in **Supplementary Note 3**. GWAS results for BIP<sup>50</sup> (6990 cases, 4820 controls)  
499 were obtained from the website of the PGC  
500 (<https://www.med.unc.edu/pgc/files/resultfiles/pgc.cross.bip.zip>).

501

502 **Code availability**

503 Source code for GWIS and LD-aware enrichment analyses will be made available through a  
504 GIT repository.

505

506 **Data availability**

507 The GWAS summary statistics that were analysed during the current study are available on  
508 the website of the Social Science Genetic Association Consortium (SSGAC):  
509 <http://www.thessgac.org/#!/data/kuzq8>. The GRAS data collection is not publicly available  
510 due to strict data protection laws in Germany for study participants that could potentially be  
511 identified. For further information, contact the study's principal investigator Prof. Dr.  
512 Hannelore Ehrenreich ([ehrenreich@em.mpg.de](mailto:ehrenreich@em.mpg.de)).

513 **REFERENCES**

514

- 515 1. Knapp, M., Mangalore, R. & Simon, J. The global costs of schizophrenia. *Schizophr.*  
516 *Bull.* **30**, 279–293 (2004).
- 517 2. Sullivan, P. F., Kendler, K. S. & Neale, M. C. Schizophrenia as a Complex Trait. *Arch.*  
518 *Gen. Psychiatry* **60**, 1187 (2003).
- 519 3. Polderman, T. J. C. *et al.* Meta-analysis of the heritability of human traits based on  
520 fifty years of twin studies. *Nat. Genet.* **47**, 702–709 (2015).
- 521 4. Stepniak, B. *et al.* Accumulated environmental risk determining age at schizophrenia  
522 onset: a deep phenotyping-based study. *The Lancet Psychiatry* **1**, 444–453 (2014).
- 523 5. Ripke, S. *et al.* Biological insights from 108 schizophrenia-associated genetic loci.  
524 *Nature* **511**, 421–427 (2014).
- 525 6. Bhatia, G. *et al.* Haplotypes of common SNPs can explain missing heritability of  
526 complex diseases. (2015). at <<http://dx.doi.org/10.1101/022418>>
- 527 7. Ehrenreich, H. *et al.* OTTO: a new strategy to extract mental disease-relevant  
528 combinations of GWAS hits from individuals. *Mol. Psychiatry* (2016).  
529 doi:10.1038/mp.2016.208
- 530 8. Okbay, A. *et al.* Genome-wide association study identifies 74 loci associated with  
531 educational attainment. *Nature* **533**, 539–542 (2016).
- 532 9. Okbay, A. *et al.* Genetic variants associated with subjective well-being, depressive  
533 symptoms, and neuroticism identified through genome-wide analyses. *Nat. Genet.* **48**,  
534 624–633 (2016).
- 535 10. Swanson, C. L., Gur, R. C., Bilker, W., Petty, R. G. & Gur, R. E. Premorbid  
536 educational attainment in schizophrenia: association with symptoms, functioning, and  
537 neurobehavioral measures. *Biol. Psychiatry* **44**, 739–747 (1998).
- 538 11. Kahn, R. S. & Keefe, R. S. E. Schizophrenia Is a Cognitive Illness. *JAMA Psychiatry*  
539 **70**, 1107 (2013).
- 540 12. Kraepelin, E. *Psychiatrie: Ein Lehrbuch für Studierende und Ärzte.* (Verlag von  
541 Johann Ambrosius Barth, 1893).
- 542 13. Trotta, A., Murray, R. & MacCabe, J. Do premorbid and post-onset cognitive  
543 functioning differ between schizophrenia and bipolar disorder? A systematic review  
544 and meta-analysis. *Psychol. Med.* **45**, 381–394 (2015).
- 545 14. Murray, R. M. *et al.* A developmental model for similarities and dissimilarities  
546 between schizophrenia and bipolar disorder. *Schizophr. Res.* **71**, 405–416 (2004).
- 547 15. Murray, R. M., O’Callaghan, E., Castle, D. J. & Lewis, S. W. A Neurodevelopmental  
548 Approach to the Classification of Schizophrenia. *Schizophr. Bull.* **18**, 319–332 (1992).
- 549 16. Stefansson, H. *et al.* CNVs conferring risk of autism or schizophrenia affect cognition  
550 in controls. *Nature* **505**, 361–366 (2013).
- 551 17. Power, R. A. *et al.* Polygenic risk scores for schizophrenia and bipolar disorder predict  
552 creativity. *Nat. Neurosci.* **18**, 953–955 (2015).
- 553 18. Kendler, K. S., Ohlsson, H., Sundquist, J. & Sundquist, K. IQ and Schizophrenia in a  
554 Swedish National Sample: Their Causal Relationship and the Interaction of IQ With

- 555 Genetic Risk. *Am. J. Psychiatry* **172**, 259–265 (2015).
- 556 19. Sniekers, S. *et al.* Genome-wide association meta-analysis of 78,308 individuals  
557 identifies new loci and genes influencing human intelligence. *Nat. Genet.* (2017).  
558 doi:doi:10.1038/ng.3869
- 559 20. Camisa, K. M. *et al.* Personality traits in schizophrenia and related personality  
560 disorders. *Psychiatry Res.* **133**, 23–33 (2005).
- 561 21. Beauchamp, M.-C., Lecomte, T., Lecomte, C., Leclerc, C. & Corbière, M. Do people  
562 with a first episode of psychosis differ in personality profiles? *Schizophr. Res.* **85**,  
563 162–167 (2006).
- 564 22. Bagby, R. M. *et al.* Bipolar disorder, unipolar depression and the Five-Factor Model of  
565 personality. *J. Affect. Disord.* **41**, 25–32 (1996).
- 566 23. Scholten, M., Vanhok, J., Aleman, A. & Kahn, R. Behavioral inhibition system  
567 (BIS), Behavioral activation system (BAS) and schizophrenia: Relationship with  
568 psychopathology and physiology. *J. Psychiatr. Res.* **40**, 638–645 (2006).
- 569 24. Felice Reddy, L. *et al.* Behavioral approach and avoidance in schizophrenia: an  
570 evaluation of motivational profiles. *Schizophr. Res.* **159**, 164–70 (2014).
- 571 25. Ackerman, P. L. & Heggestad, E. D. Intelligence, personality, and interests: evidence  
572 for overlapping traits. *Psychol. Bull.* **121**, 219–45 (1997).
- 573 26. Bartels, M. *et al.* The five factor model of personality and intelligence: A twin study  
574 on the relationship between the two constructs. *Pers. Individ. Dif.* **53**, 368–373 (2012).
- 575 27. Rietveld, C. A. *et al.* Common genetic variants associated with cognitive performance  
576 identified using the proxy-phenotype method. *Proc. Natl. Acad. Sci. U. S. A.* **111**,  
577 13790–13794 (2014).
- 578 28. Ripke, S. *et al.* Biological insights from 108 schizophrenia-associated genetic loci.  
579 *Nature* **511**, 421–427 (2014).
- 580 29. Ribbe, K. *et al.* The cross-sectional GRAS sample: A comprehensive phenotypical  
581 data collection of schizophrenic patients. *BMC Psychiatry* **10**, 91 (2010).
- 582 30. Pardiñas, A. F. *et al.* Common schizophrenia alleles are enriched in mutation-  
583 intolerant genes and maintained by background selection. (2016). at  
584 <<http://dx.doi.org/10.1101/068593>>
- 585 31. Le Hellard, S. *et al.* Identification of gene loci that overlap between schizophrenia and  
586 educational attainment. *Schizophr. Bull.* (2016). doi:10.1093/schbul/sbw085
- 587 32. Kichaev, G. *et al.* Improved methods for multi-trait fine mapping of pleiotropic risk  
588 loci. *Bioinformatics* **33**, 248–255 (2017).
- 589 33. So, H.-C. *et al.* Identification of neuroglycan C and interacting partners as potential  
590 susceptibility genes for schizophrenia in a Southern Chinese population. *Am. J. Med.*  
591 *Genet. Part B Neuropsychiatr. Genet.* **153B**, 103–113 (2010).
- 592 34. Arion, D., Horváth, S., Lewis, D. A. & Mirnics, K. Infragranular gene expression  
593 disturbances in the prefrontal cortex in schizophrenia: signature of altered neural  
594 development? *Neurobiol. Dis.* **37**, 738–46 (2010).
- 595 35. Salih, D. A. M. *et al.* FoxO6 regulates memory consolidation and synaptic function.  
596 *Genes Dev.* **26**, 2780–2801 (2012).

- 597 36. Maiese, K. FoxO Proteins in the Nervous System. *Anal. Cell. Pathol.* **2015**, 1–15  
598 (2015).
- 599 37. Aruga, J., Yokota, N. & Mikoshiba, K. Human SLITRK family genes: genomic  
600 organization and expression profiling in normal brain and brain tumor tissue. *Gene*  
601 **315**, 87–94 (2003).
- 602 38. Beaubien, F. *et al.* Slitrk1 is localized to excitatory synapses and promotes their  
603 development. *Sci. Rep.* **6**, 27343 (2016).
- 604 39. Proenca, C. C. *et al.* Slitrks as emerging candidate genes involved in neuropsychiatric  
605 disorders. *Trends Neurosci.* **34**, 143–53 (2011).
- 606 40. Altshuler, D. M., Gibbs, R. A. & Peltonen, L. Integrating common and rare genetic  
607 variation in diverse human populations. *Nature* **467**, 52–58 (2010).
- 608 41. Nieuwboer, H. A., Pool, R., Dolan, C. V., Boomsma, D. I. & Nivard, M. G. GWIS:  
609 Genome-wide inferred statistics for functions of multiple phenotypes. *Am. J. Hum.*  
610 *Genet.* **99**, 917–927 (2016).
- 611 42. Bulik-Sullivan, B. K. *et al.* An atlas of genetic correlations across human diseases and  
612 traits. *Nat. Genet.* **47**, 1236–1241 (2015).
- 613 43. Okbay, A. *et al.* Genetic variants associated with subjective well-being, depressive  
614 symptoms, and neuroticism identified through genome-wide analyses. *Nat. Genet.* **48**,  
615 624–633 (2016).
- 616 44. Purcell, S. *et al.* PLINK: A tool set for whole-genome association and population-  
617 based linkage analyses. *Am. J. Hum. Genet.* **81**, 559–575 (2007).
- 618 45. Chang, C. C. *et al.* Second-generation PLINK: rising to the challenge of larger and  
619 richer datasets. *Gigascience* **4**, 7 (2015).
- 620 46. The 1000 Genomes Project Consortium. An integrated map of genetic variation from  
621 1,092 human genomes. *Nature* **491**, 56–65 (2012).
- 622 47. Pers, T. H. *et al.* Biological interpretation of genome-wide association studies using  
623 predicted gene functions. *Nat. Commun.* **6**, 5890 (2015).
- 624 48. Frey, B. J. & Dueck, D. Clustering by passing messages between data points. *Science*  
625 **315**, (2007).
- 626 49. Bulik-Sullivan, B. K. *et al.* LD Score regression distinguishes confounding from  
627 polygenicity in genome-wide association studies. *Nat. Genet.* **47**, 291–295 (2015).
- 628 50. Consortium, C.-D. G. of the P. G. Identification of risk loci with shared effects on five  
629 major psychiatric disorders: a genome-wide analysis. *Lancet* **381**, 1371–1379 (2013).
- 630  
631

632 **ACKNOWLEDGMENTS**

633 This research was carried out under the auspices of the Social Science Genetic Association  
634 Consortium (SSGAC), including use of the UK Biobank Resource (application reference  
635 number 11425). We thank all research consortia that provide access to GWAS summary  
636 statistics in the public domain. Specifically, we acknowledge data access from the Psychiatric  
637 Genomics Consortium (PGC), the Genetic Investigation of ANthropometric Traits  
638 Consortium (GIANT), the International Inflammatory Bowel Disease Genetics Consortium  
639 (IIBDGC), the International Genomics of Alzheimer's Project (IGAP), the  
640 CARDIoGRAMplusC4D Consortium, the Reproductive Genetics Consortium (ReproGen),  
641 the Tobacco and Genetics Consortium (TAG), the Meta-Analyses of Glucose and Insulin-  
642 related traits Consortium (MAGIC), the ENIGMA Consortium, and the Childhood  
643 Intelligence Consortium (CHIC). We would like to thank the customers and employees of  
644 23andMe for making this work possible as well as Joyce J. Tung, Nick. A. Furlotte, and  
645 David. A Hinds from the 23andMe research team. This study was supported by funding from  
646 an ERC Consolidator Grant (647648 EdGe, Philipp D. Koellinger), the Max Planck Society,  
647 the Max Planck Förderstiftung, the DFG (CNMPB), EXTRABRAIN EU-FP7, the  
648 Niedersachsen-Research Network on Neuroinfectiology (N-RENNT), and EU-AIMS. Michel  
649 G. Nivard was supported by a Royal Netherlands Academy of Science Professor Award to  
650 Dorret I. Boomsma (PAH/6635). Additional acknowledgements are provided in the  
651 **Supplementary Note 16.**

652

653 **AUTHOR CONTRIBUTIONS**

654 P.D.K. designed and oversaw the study and conducted proxy-phenotype analyses. V.B. and  
655 M.M. carried out analyses in the GRAS sample. R.V., C.A.P.B., M.N, and P.D.K. developed  
656 statistical methods. V.B. conducted bioinformatics and computed the LD-aware enrichment  
657 tests. C.A.P.B. and R.V. conducted simulation analyses. M.N. computed GWIS results,  
658 genetic correlations, and carried out pleiotropy analyses. R.K.L. assisted with biological  
659 annotation and visualization of results. P.D.K., V.B., M.M., and H.E. made especially major  
660 contributions to writing and editing. All authors contributed to and critically reviewed the  
661 manuscript.

662

663 **COMPETING FINANCIAL INTERESTS**

664 The authors declare no conflict of interests.

665

666 **ADDITIONAL INFORMATION**

667 **Supplementary Notes** are available at *Nature Communications'* website.

668



669 **FIGURE LEGENDS**

670

671 **Figure 1: Workflow of the proxy-phenotype analyses.**

672

673 *Notes:* Educational attainment (EA) and schizophrenia (SZ) GWAS results are based on the analyses reported in  
674 ref. <sup>5,8</sup>. All cohorts that were part of the SZ GWAS were excluded from the meta-analysis on EA. The GRAS  
675 data collection was not included in either the SZ or the EA meta-analysis. Proxy-phenotype analyses were  
676 conducted using 8,240,280 autosomal SNPs that passed quality control. Genetic outliers of non-European  
677 descent ( $N = 13$  cases) were excluded from the analysis in the GRAS data collection.

678

679 **Figure 2: Results of the proxy-phenotype analyses.**

*Notes:* Panel a: **Manhattan plot for educational attainment (EA) associations ( $n = 363,502$ )**. The  $x$ -axis is the  
chromosomal position, and the  $y$ -axis is the significance on a  $-\log_{10}$  scale (2-sided). The black dashed line  
shows the suggestive significance level of  $10^{-5}$  that we specified in our preregistered analysis plan. Turquoise and  
magenta crosses identify EA-associated lead-SNPs that are also associated with SZ at nominal or Bonferroni-  
adjusted significance levels, respectively.

Panel b: **Q–Q plot of the 506 EA-associated SNPs for schizophrenia (SZ) ( $n = 34,409$  cases and  $n = 45,670$   
controls)**. SNPs with concordant effects on both phenotypes are pink, and SNPs with discordant effects are  
blue. SNPs outside the grey area (21 SNPs) pass the Bonferroni-corrected significance threshold that corrects  
for the total number of SNPs we tested ( $P < 0.05/506 = 9.88 \times 10^{-5}$ ) and are labelled with their rs numbers.  
Observed and expected  $P$  values are on a  $-\log_{10}$  scale. For the sign concordance test:  $P = 0.40$ , 2-sided.

**Figure 3: Genetic correlations of GWAS and GWIS results that are central to the  
relationship between SZ and EA.**

*Notes:* The heatmap displays the genetic correlations across 7 sets of GWAS or GWIS summary statistics.  
Genetic correlations were estimated with LD score regression.<sup>42</sup> The colour scale represents the genetic  
correlations ranging from  $-1$  (red) to  $1$  (blue). Asterisks denote significant genetic correlations at  $P$  value  $< 0.01$ .

680

681

682 **Table 1: SNPs significantly associated with schizophrenia after Bonferroni correction.**

|    | SNP-ID           | EA-<br><i>beta</i> | <i>signs</i><br>concordant? | SZ- <i>R</i> <sup>2</sup><br>(adj) | SZ- <i>Odds</i><br>(adj) | EAF         | Power<br>( $\alpha = 0.05/506$ ) | Chance that<br>SNP has direct<br>pleiotropic effect<br>on EA and SZ | Posterior probability of true association with SZ |              |              |              |
|----|------------------|--------------------|-----------------------------|------------------------------------|--------------------------|-------------|----------------------------------|---------------------------------------------------------------------|---------------------------------------------------|--------------|--------------|--------------|
|    |                  |                    |                             |                                    |                          |             |                                  |                                                                     | Prior belief ( $\pi$ )                            |              |              |              |
|    |                  |                    |                             |                                    |                          |             |                                  |                                                                     | 0.1%                                              | 1.0%         | 5.0%         | 10.0%        |
| 1  | rs79210963       | -0.016             | yes                         | 0.021%                             | 0.931                    | 0.89        | 22.9%                            | High                                                                | 75.0%                                             | 96.8%        | 99.3%        | 99.7%        |
| 2  | rs7610856        | 0.013              | no                          | 0.022%                             | 0.955                    | 0.41        | 22.8%                            | Medium                                                              | 74.9%                                             | 96.8%        | 99.3%        | 99.7%        |
| 3  | rs10896636       | 0.012              | no                          | 0.020%                             | 0.956                    | 0.67        | 17.8%                            | High                                                                | 68.7%                                             | 95.6%        | 99.1%        | 99.5%        |
| 4  | rs756912         | -0.015             | yes                         | 0.022%                             | 0.956                    | 0.51        | 22.7%                            | Low                                                                 | 74.8%                                             | 96.7%        | 99.3%        | 99.7%        |
| 5  | rs6449503        | 0.018              | no                          | 0.020%                             | 0.961                    | 0.51        | 12.9%                            | Low                                                                 | 60.0%                                             | 93.7%        | 98.7%        | 99.3%        |
| 6  | <b>rs7336518</b> | -0.016             | yes                         | <b>0.014%</b>                      | <b>0.964</b>             | <b>0.13</b> | <b>1.5%</b>                      | <b>Medium</b>                                                       | <b>13.4%</b>                                      | <b>60.6%</b> | <b>88.5%</b> | <b>93.9%</b> |
| 7  | rs143283559      | 0.014              | no                          | 0.017%                             | 0.965                    | 0.72        | 4.6%                             | Medium                                                              | 32.8%                                             | 83.0%        | 96.1%        | 98.0%        |
| 8  | rs11210935       | 0.015              | no                          | 0.014%                             | 0.973                    | 0.77        | 1.2%                             | Low                                                                 | 10.9%                                             | 55.1%        | 86.0%        | 92.5%        |
| 9  | rs77000541       | -0.014             | yes                         | 0.018%                             | 0.974                    | 0.33        | 1.6%                             | Low                                                                 | 14.1%                                             | 62.2%        | 89.2%        | 94.3%        |
| 10 | rs2819344        | 0.014              | no                          | 0.017%                             | 0.983                    | 0.62        | 0.3%                             | High                                                                | 3.0%                                              | 23.3%        | 60.4%        | 75.3%        |
| 11 | rs4500960        | -0.013             | no                          | 0.017%                             | 1.017                    | 0.47        | 0.3%                             | Low                                                                 | 3.0%                                              | 23.3%        | 60.4%        | 75.3%        |
| 12 | rs28360516       | -0.012             | no                          | 0.013%                             | 1.027                    | 0.70        | 1.4%                             | Low                                                                 | 12.6%                                             | 59.0%        | 87.8%        | 93.5%        |
| 13 | <b>rs7522116</b> | 0.011              | yes                         | <b>0.015%</b>                      | <b>1.029</b>             | <b>0.56</b> | <b>3.0%</b>                      | <b>Low</b>                                                          | <b>23.8%</b>                                      | <b>75.8%</b> | <b>94.0%</b> | <b>96.9%</b> |
| 14 | rs7593947        | 0.014              | yes                         | 0.018%                             | 1.040                    | 0.51        | 12.5%                            | Low                                                                 | 59.1%                                             | 93.5%        | 98.6%        | 99.3%        |
| 15 | rs11694989       | 0.011              | yes                         | 0.021%                             | 1.044                    | 0.43        | 17.9%                            | Low                                                                 | 68.8%                                             | 95.7%        | 99.1%        | 99.5%        |
| 16 | rs320700         | 0.013              | yes                         | 0.024%                             | 1.054                    | 0.65        | 36.4%                            | High                                                                | 85.3%                                             | 98.3%        | 99.7%        | 99.8%        |
| 17 | rs3957165        | 0.015              | yes                         | 0.020%                             | 1.056                    | 0.83        | 14.7%                            | Low                                                                 | 63.6%                                             | 94.6%        | 98.9%        | 99.4%        |
| 18 | rs10791106       | 0.011              | yes                         | 0.026%                             | 1.056                    | 0.54        | 46.9%                            | Low                                                                 | 89.9%                                             | 98.9%        | 99.8%        | 99.9%        |
| 19 | rs2992632        | 0.016              | yes                         | 0.025%                             | 1.060                    | 0.74        | 36.8%                            | Medium                                                              | 85.5%                                             | 98.3%        | 99.7%        | 99.8%        |
| 20 | rs10773002       | 0.022              | yes                         | 0.043%                             | 1.087                    | 0.28        | 91.0%                            | Low                                                                 | 99.0%                                             | 99.9%        | 100.0%       | 100.0%       |
| 21 | rs4378243        | 0.019              | yes                         | 0.044%                             | 1.112                    | 0.85        | 91.5%                            | Low                                                                 | 99.1%                                             | 99.9%        | 100.0%       | 100.0%       |

683 *Notes:* The SNPs in the table are ordered by their *Odds* ratio on SZ. Effect sizes for SZ (in *R*<sup>2</sup> and *Odds*) are downward adjusted for the winner's curse<sup>27</sup>. EA (*beta*) is the  
684 standardized *beta* of a SNP for educational attainment GWAS. *R*<sup>2</sup> was approximated from the winner's curse adjusted *Odds* ratios, using the formulas described in **Supplementary**  
685 **Note 6.2**. The winner's curse adjustment took into account that only SNPs with *P* = 0.05/506 were selected. SNPs with concordant effects on both SZ and EA are marked as "yes"  
686 in the sign concordance column. *EAF* is the effect allele frequency in the schizophrenia GWAS data. Power calculations assumed that the available GWAS sample size for SZ for  
687 each SNP consisted of 34,409 cases and 45,670 controls. The chance that a SNP has direct pleiotropic effects on EA and SZ has been evaluated using the procedure described in  
688 **Supplementary Note 7**. The posterior probability that these SNPs are truly associated with SZ was calculated using the Bayesian procedure developed by Rietveld et al. (2014)<sup>27</sup>.  
689 SNPs highlighted in bold are associations for SZ that have not been emphasized in the previous literature.

690

691

692  
693

**Table 2: Polygenic prediction of schizophrenia measures in the GRAS patient sample.**

|                       |                                                      | Years of education <sup>1</sup> | Age at prodrome | Age at disease onset | Premorbid IQ <sup>1</sup> | GAF <sup>2</sup> | CGI-S <sup>2</sup> | PANSS positive <sup>2</sup> | PANSS negative <sup>2</sup> |
|-----------------------|------------------------------------------------------|---------------------------------|-----------------|----------------------|---------------------------|------------------|--------------------|-----------------------------|-----------------------------|
| <b>Baseline Model</b> |                                                      |                                 |                 |                      |                           |                  |                    |                             |                             |
| <i>SZ_all</i>         | <i>standardized beta</i>                             | 0.001                           | -0.041          | -0.056               | -0.063                    | -0.024           | 0.041              | 0.033                       | 0.043                       |
|                       | <i>P value</i>                                       | 0.976                           | 0.297           | 0.129                | 0.090                     | 0.510            | 0.249              | 0.364                       | 0.253                       |
| <i>EA_all</i>         | <i>standardized beta</i>                             | 0.182**                         | 0.005           | -0.002               | 0.149**                   | 0.068*           | -0.057             | 0.001                       | -0.051                      |
|                       | <i>P value</i>                                       | 4.4x10 <sup>-09</sup>           | 0.884           | 0.961                | 7.2x10 <sup>-06</sup>     | 0.029            | 0.065              | 0.981                       | 0.107                       |
| -----                 |                                                      |                                 |                 |                      |                           |                  |                    |                             |                             |
|                       | <i>Adj. R<sup>2</sup></i>                            | 0.0612                          | 0.0023          | 0.0047               | 0.0417                    | 0.0655           | 0.0816             | 0.0711                      | 0.0243                      |
|                       | $\Delta$ <i>Adj. R<sup>2</sup>#</i>                  | 0.0312                          | -0.0010         | -0.0009              | 0.0209                    | 0.0035           | 0.0023             | -0.0010                     | 0.0015                      |
| <b>Split Model</b>    |                                                      |                                 |                 |                      |                           |                  |                    |                             |                             |
| <i>Concordant</i>     | <i>standardized beta</i>                             | -0.013                          | -0.019          | -0.031               | -0.043                    | -0.096*          | 0.050              | 0.079                       | 0.125**                     |
|                       | <i>P value</i>                                       | 0.751                           | 0.665           | 0.456                | 0.326                     | 0.022            | 0.232              | 0.059                       | 0.0036                      |
| <i>Discordant</i>     | <i>standardized beta</i>                             | 0.014                           | -0.030          | -0.035               | -0.034                    | 0.066            | <0.001             | -0.039                      | -0.072                      |
|                       | <i>P value</i>                                       | 0.730                           | 0.515           | 0.409                | 0.437                     | 0.112            | 0.996              | 0.351                       | 0.090                       |
| <i>EA_all</i>         | <i>standardized beta</i>                             | 0.191**                         | 0.002           | -0.002               | 0.153**                   | 0.122**          | -0.074             | -0.039                      | -0.118**                    |
|                       | <i>P value</i>                                       | 1.0x10 <sup>-06</sup>           | 0.965           | 0.953                | 2.7x10 <sup>-04</sup>     | 0.002            | 0.058              | 0.319                       | 0.003                       |
| -----                 |                                                      |                                 |                 |                      |                           |                  |                    |                             |                             |
|                       | <i>Adj. R<sup>2</sup></i>                            | 0.0604                          | 0.0012          | 0.0037               | 0.0406                    | 0.0694           | 0.0811             | 0.0728                      | 0.0306                      |
|                       | $\Delta$ <i>Adj. R<sup>2</sup>#</i>                  | 0.0304                          | -0.0021         | -0.0019              | 0.0198                    | 0.0074           | 0.0018             | 0.0007                      | 0.0078                      |
|                       | <i>n</i>                                             | 1,039                           | 915             | 1,043                | 903                       | 1,010            | 1,014              | 1,009                       | 1,002                       |
|                       | $\Delta R^2$ ( <i>Split Model – Baseline Model</i> ) | -0.0008                         | -0.0011         | -0.0010              | -0.0011                   | 0.0039           | -0.0005            | 0.0017                      | 0.0063                      |
|                       | <i>P value from F-test</i> <sup>o</sup>              | 0.698                           | 0.907           | 0.968                | 0.891                     | 0.023*           | 0.479              | 0.098                       | 0.007**                     |

694  
695  
696  
697  
698

Notes: Linear regression using the first 10 genetic principal components as control variables. <sup>1</sup>: Age of onset was included as covariate. <sup>2</sup>: Medication was included as covariate. # Change in *Adj. R<sup>2</sup>* of the models compared to a model that only contains the *SZ\_all* score and the control variables. <sup>o</sup> *P value* from *F-test* refers to improvement in split model compared to baseline model. \*denotes significance at  $P < 0.05$ . \*\*denotes significance at  $P < 0.01$ .

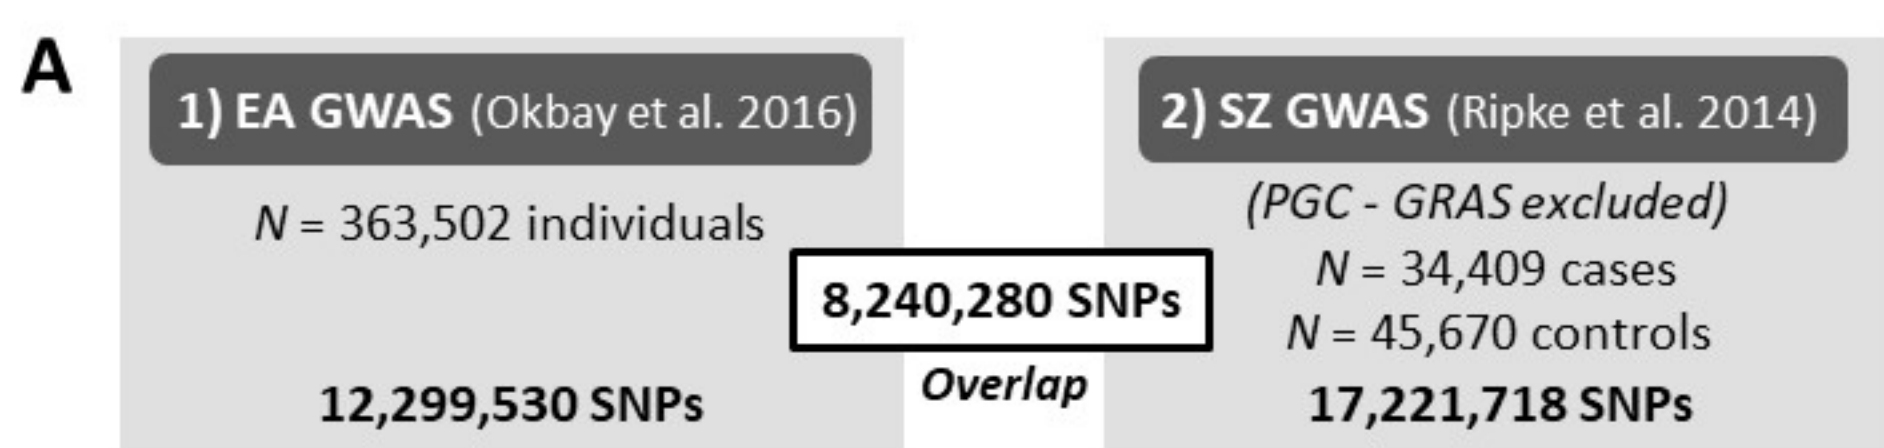

bioRxiv preprint doi: <https://doi.org/10.1101/114405>; this version posted January 31, 2018. The copyright holder for this preprint (which was not certified by peer review) is the author/funder, who has granted bioRxiv a license to display the preprint in perpetuity. It is made available under aCC-BY-NC-ND 4.0 International license.

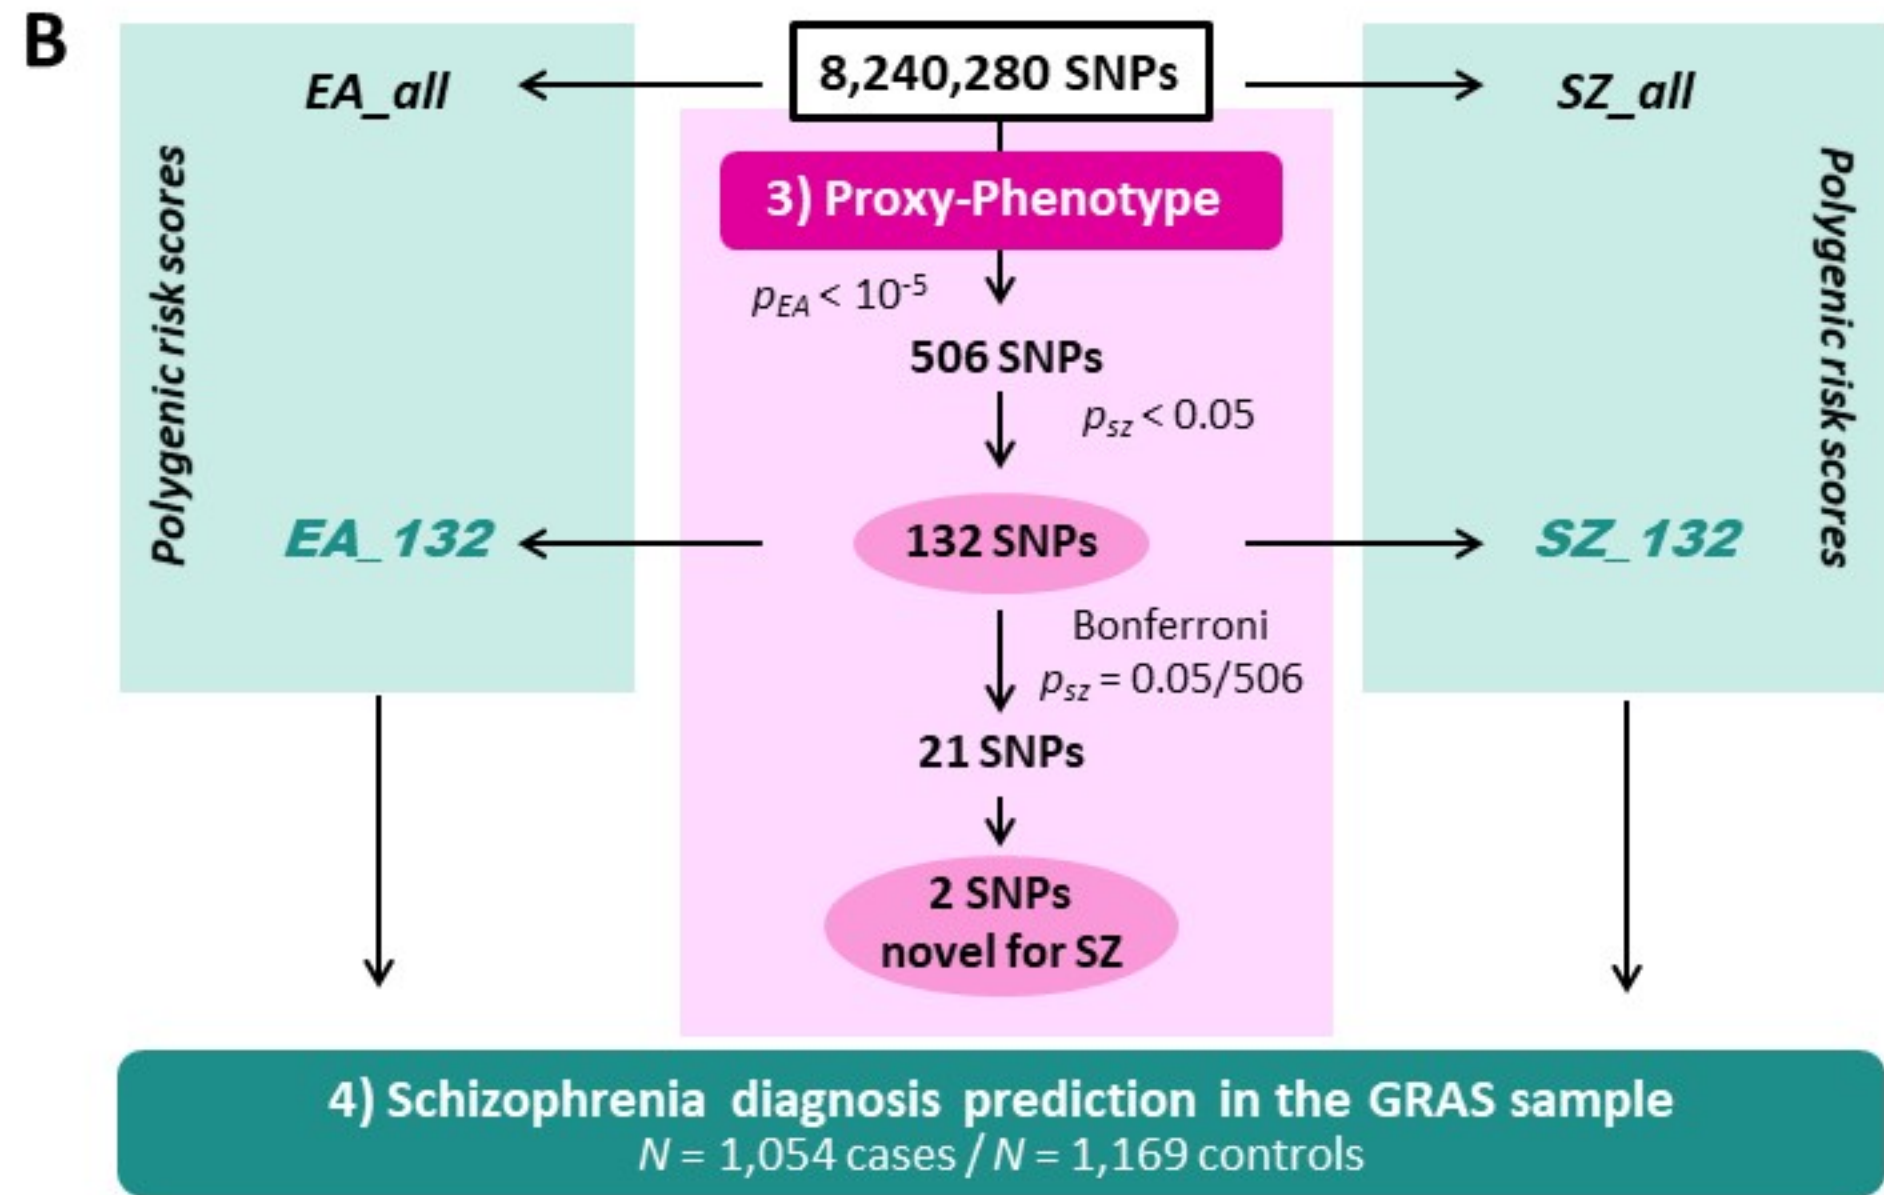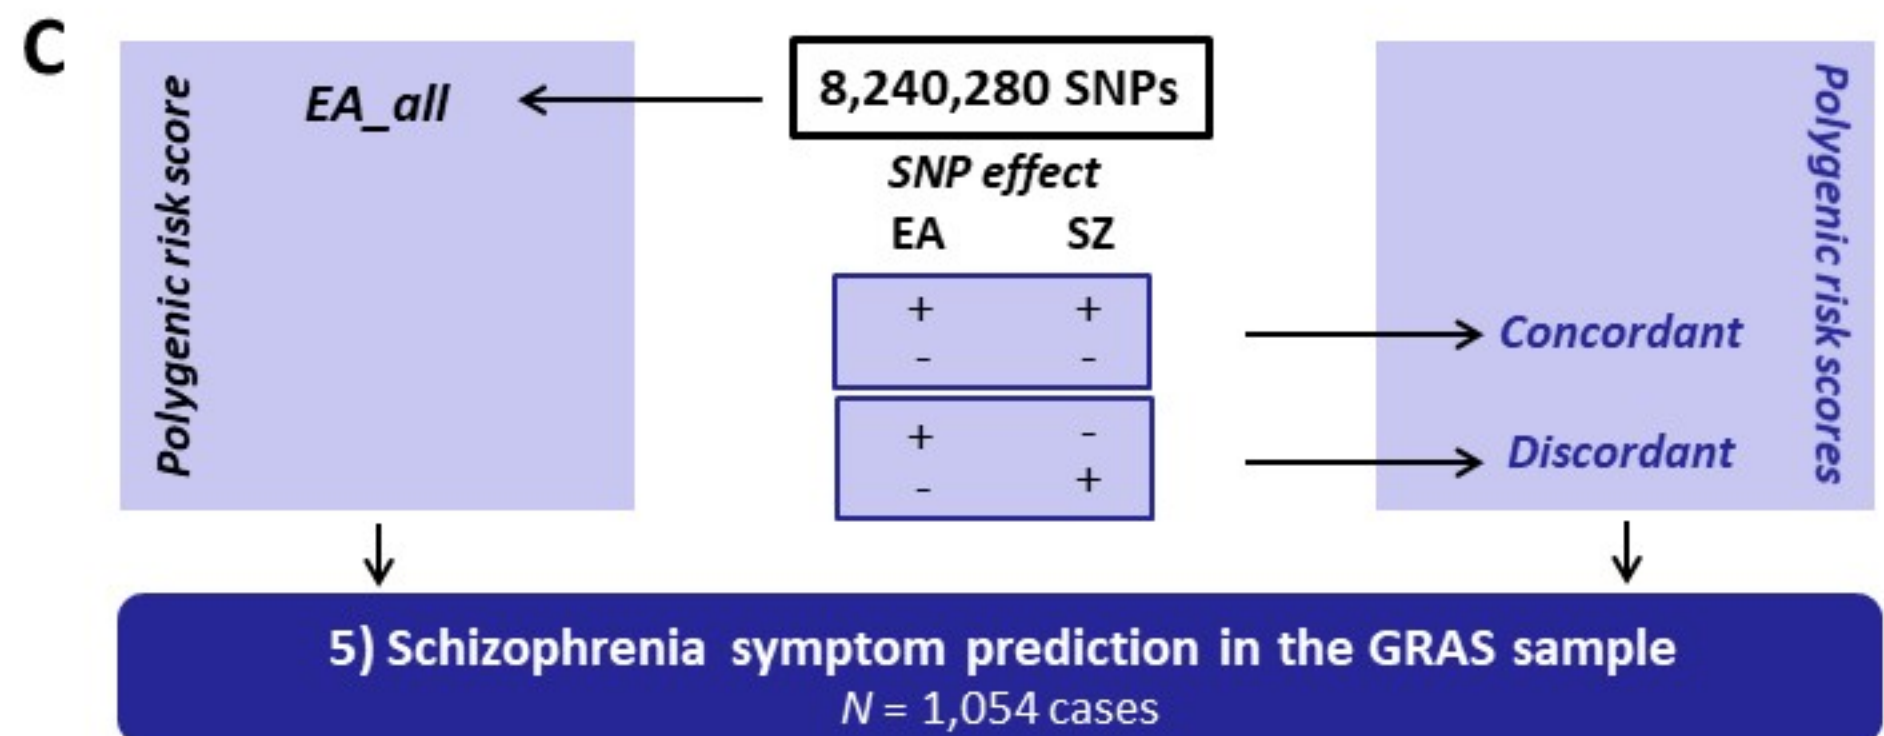

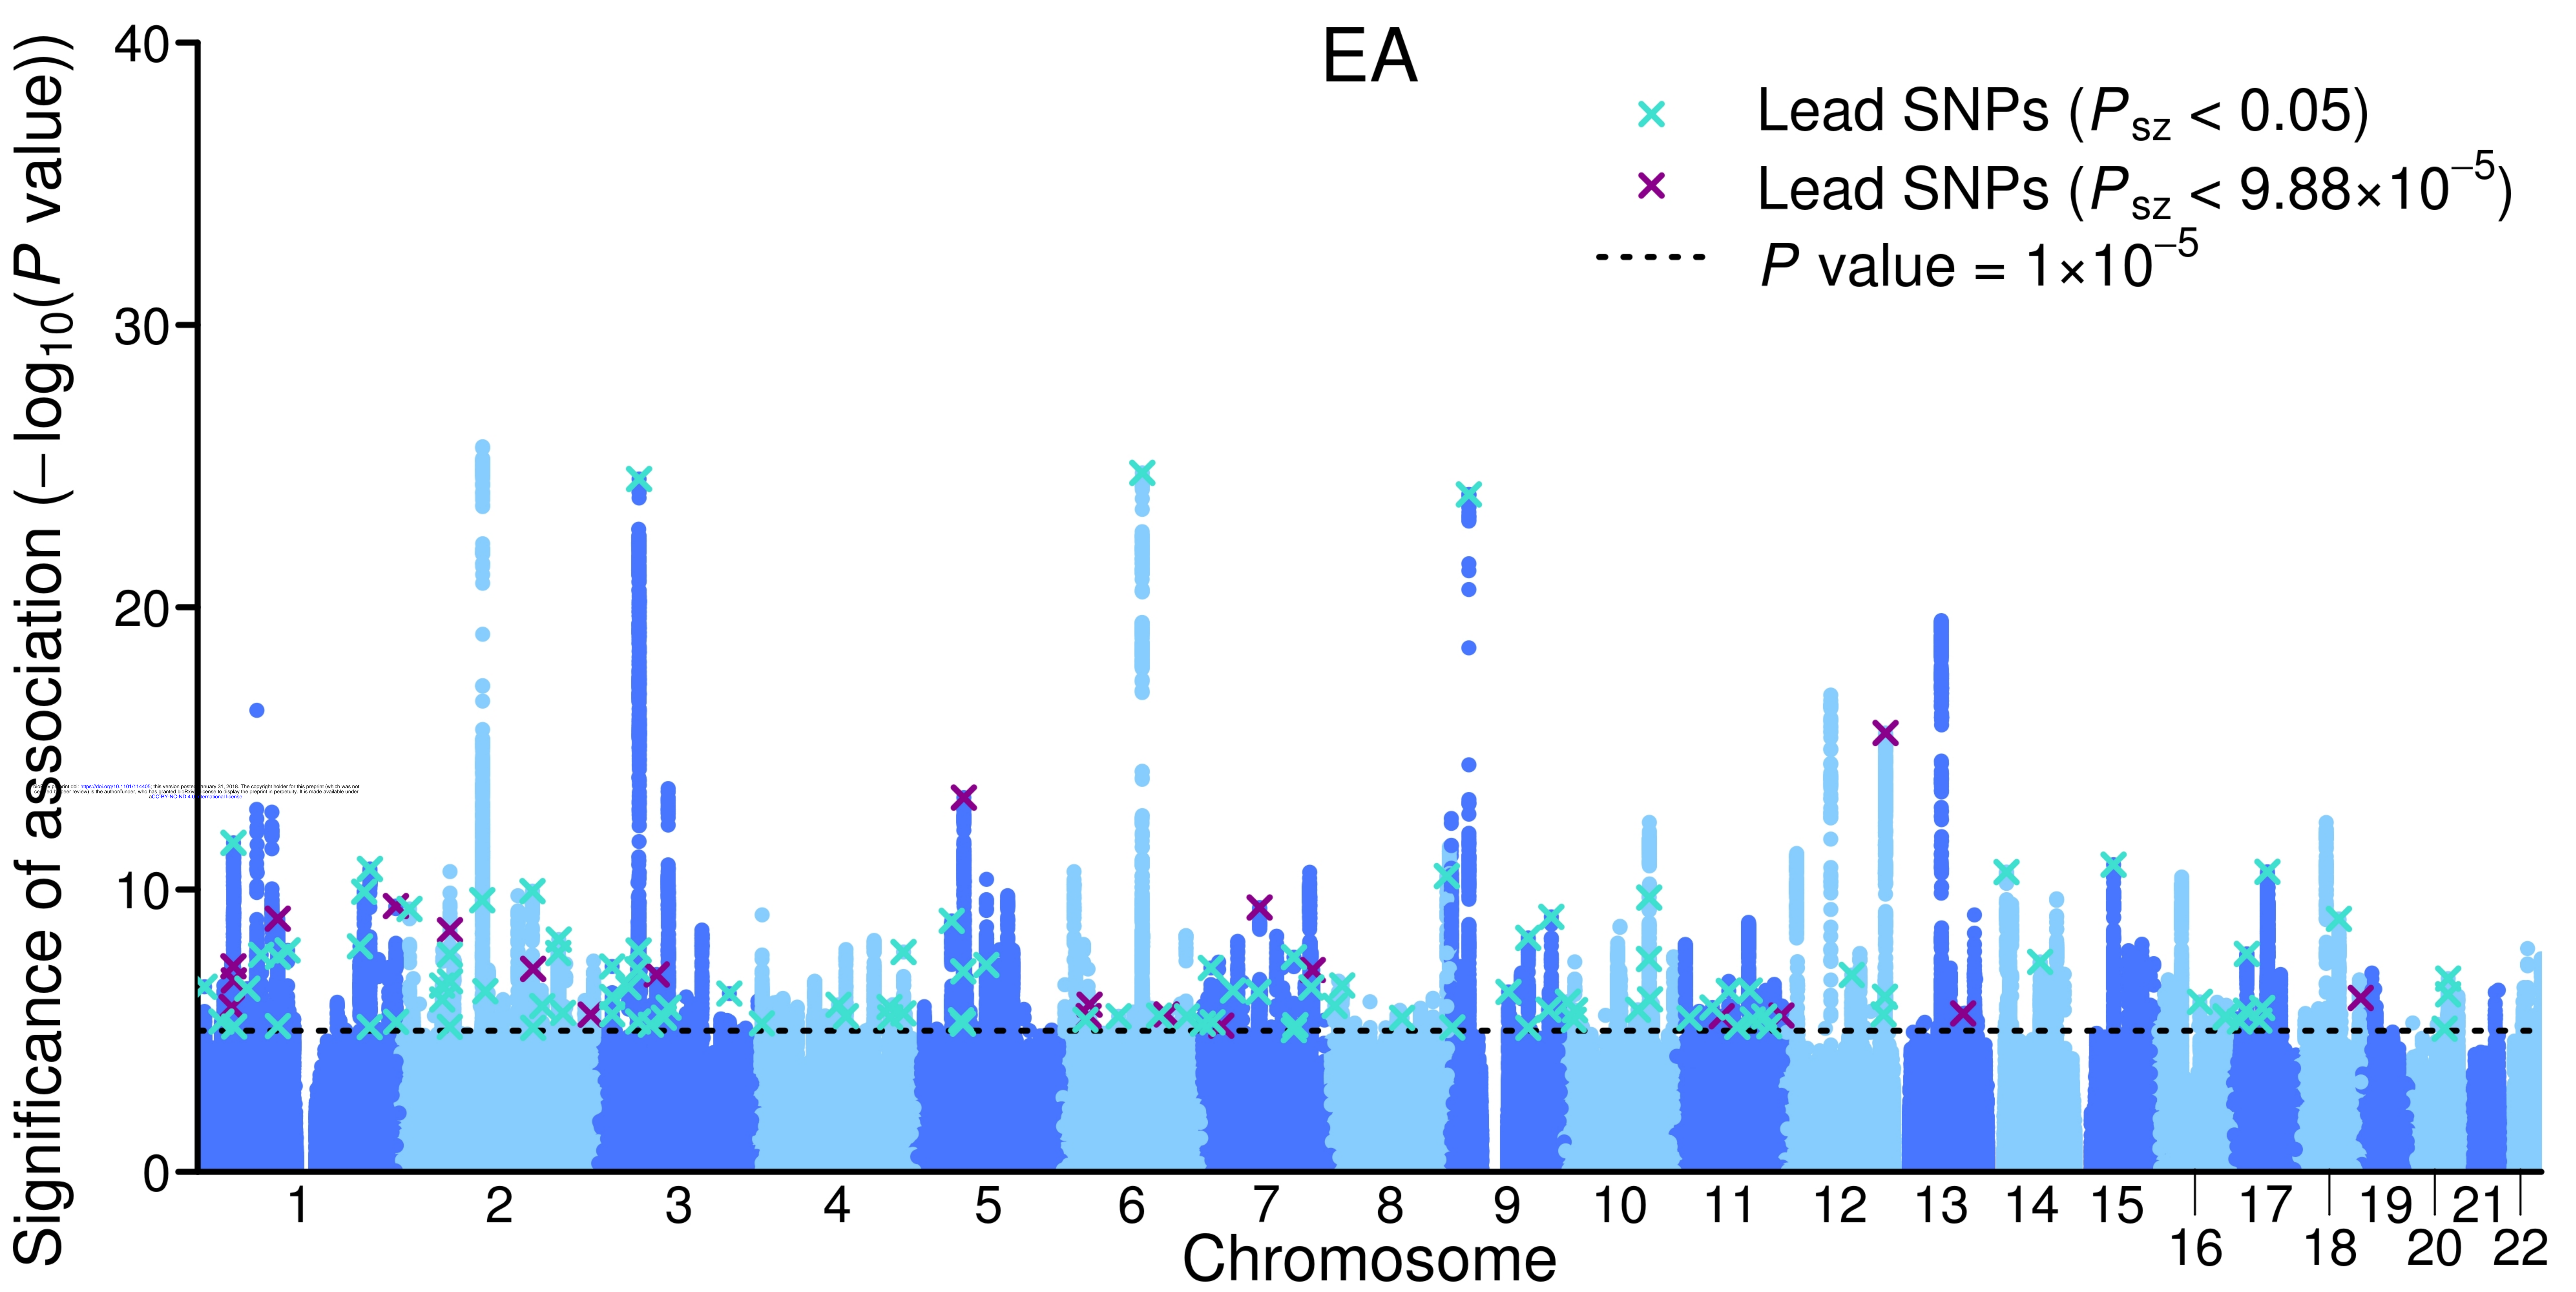

Figure 2b

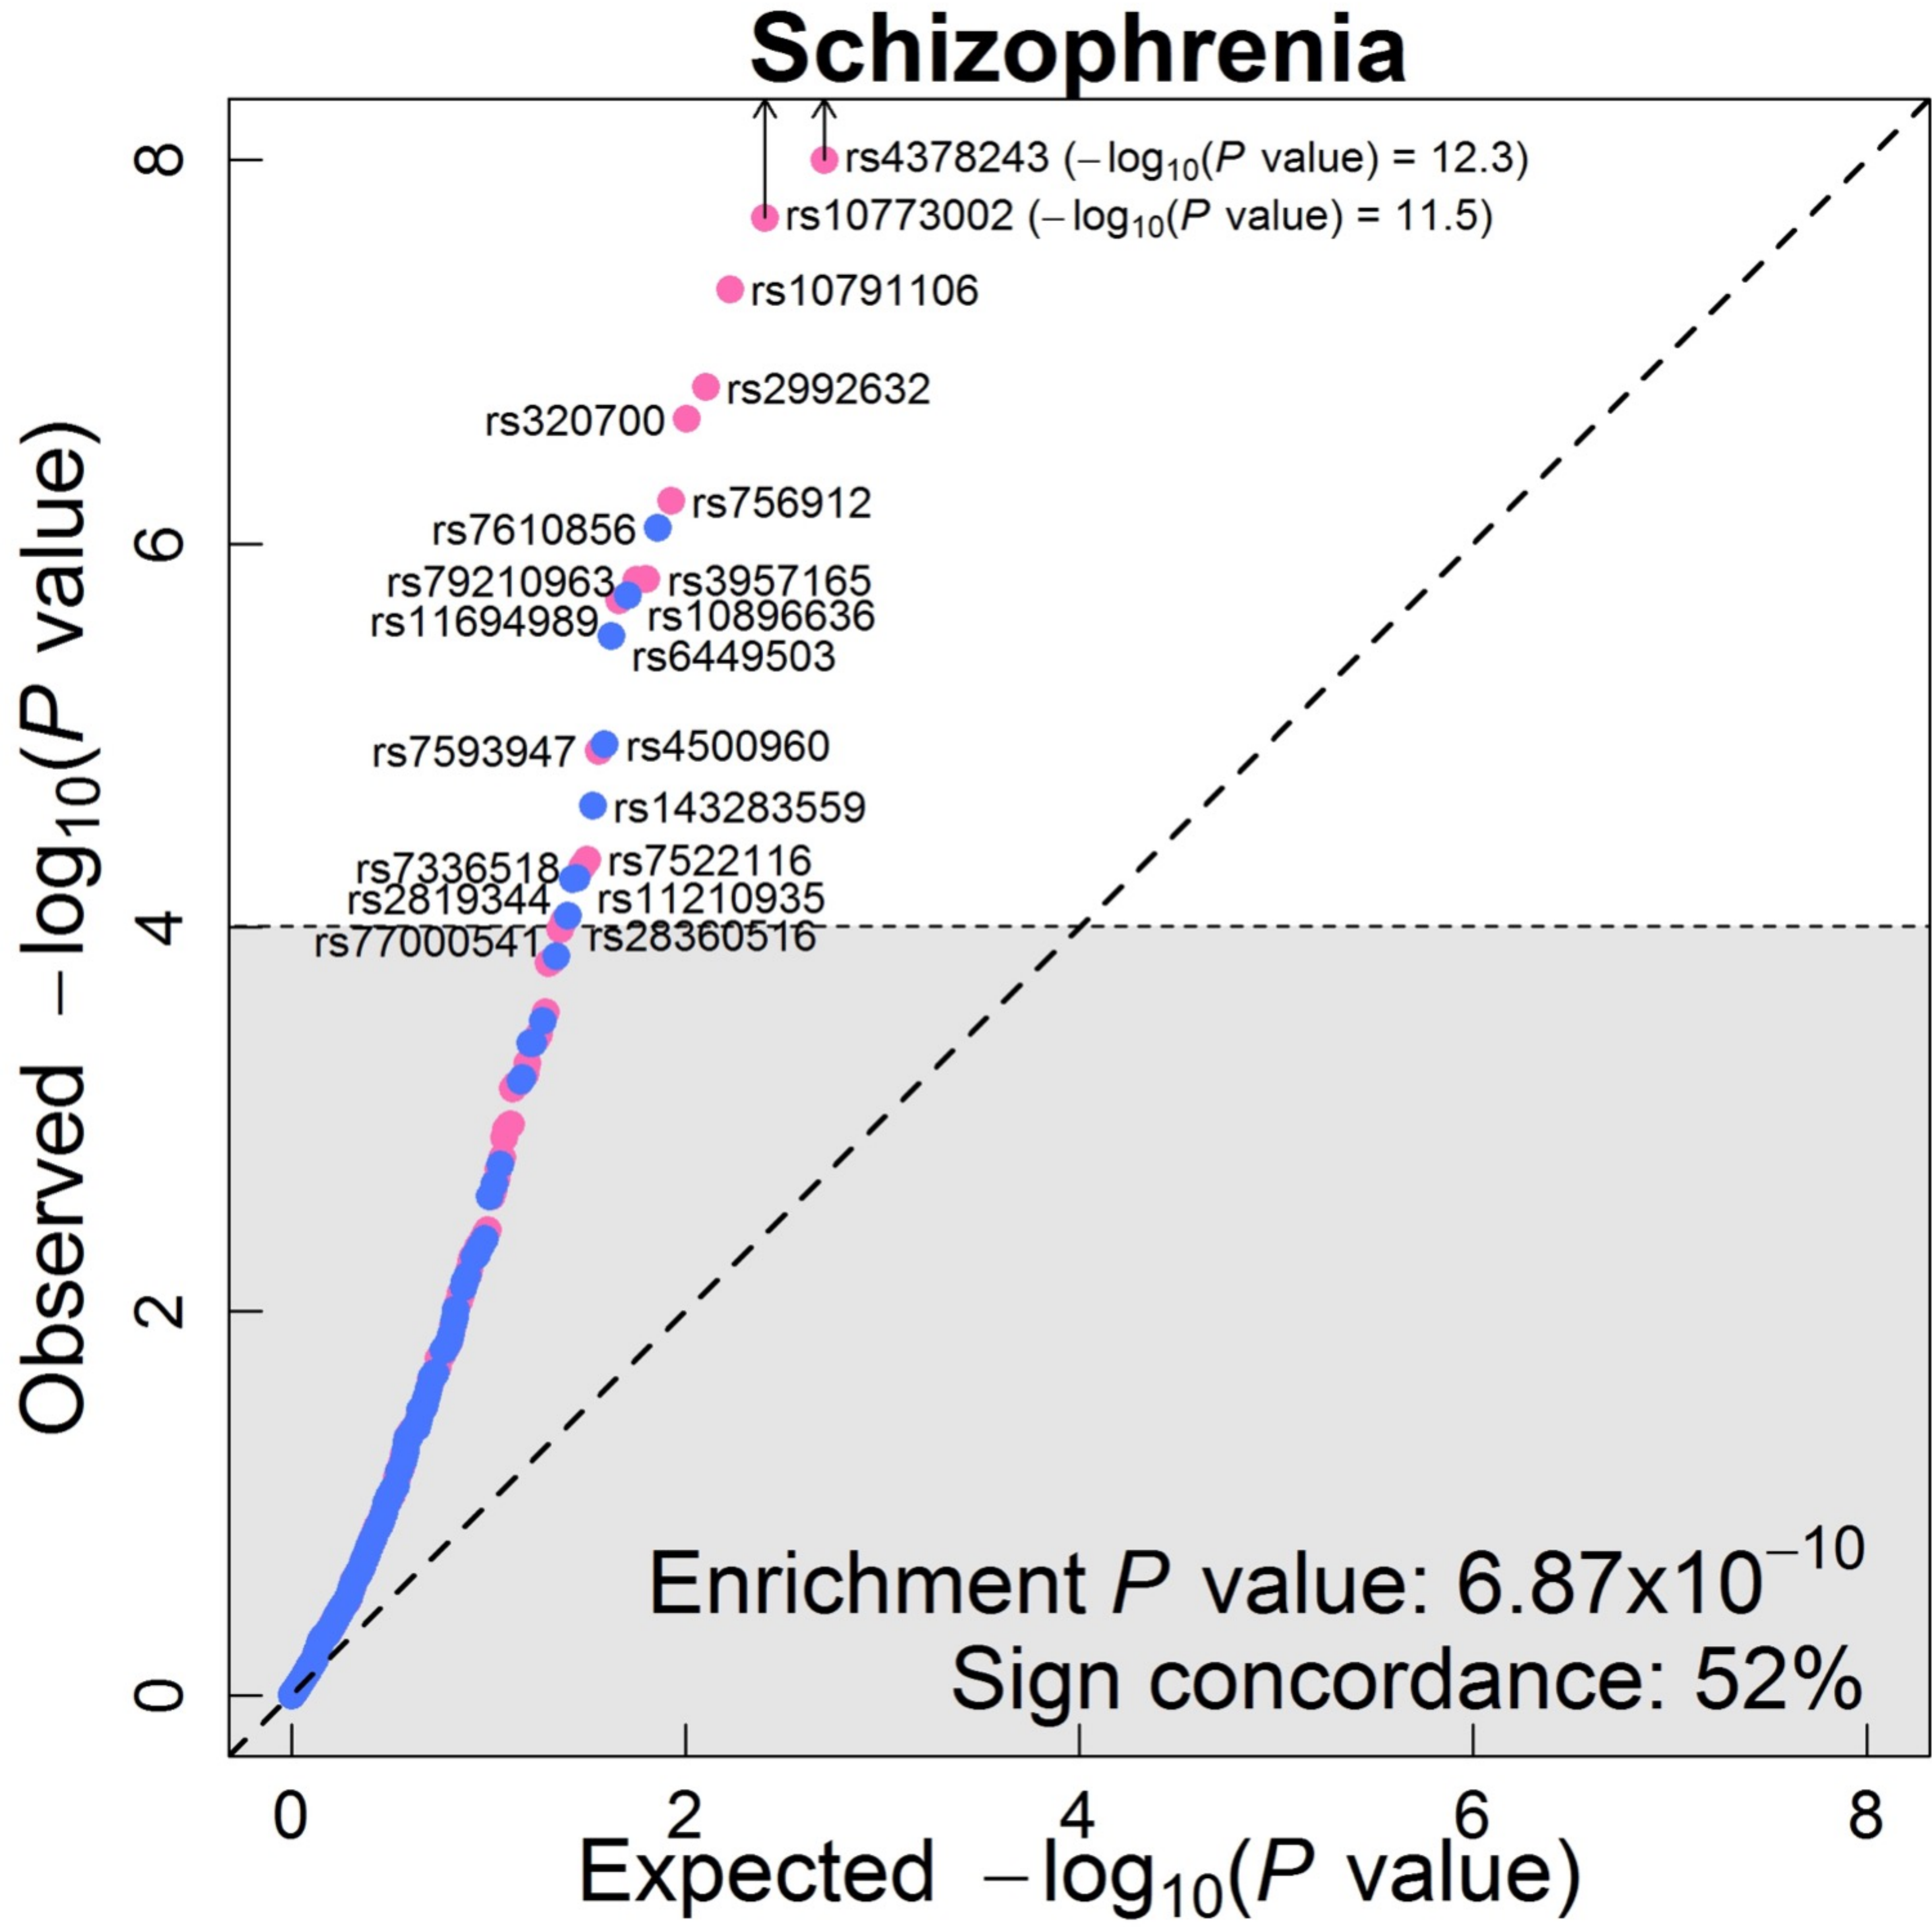

bioRxiv preprint doi: <https://doi.org/10.1101/114405>; this version posted January 31, 2018. The copyright holder for this preprint (which was not certified by peer review) is the author/funder, who has granted bioRxiv a license to display the preprint in perpetuity. It is made available under aCC-BY-NC-ND 4.0 International license.

**Figure 3**

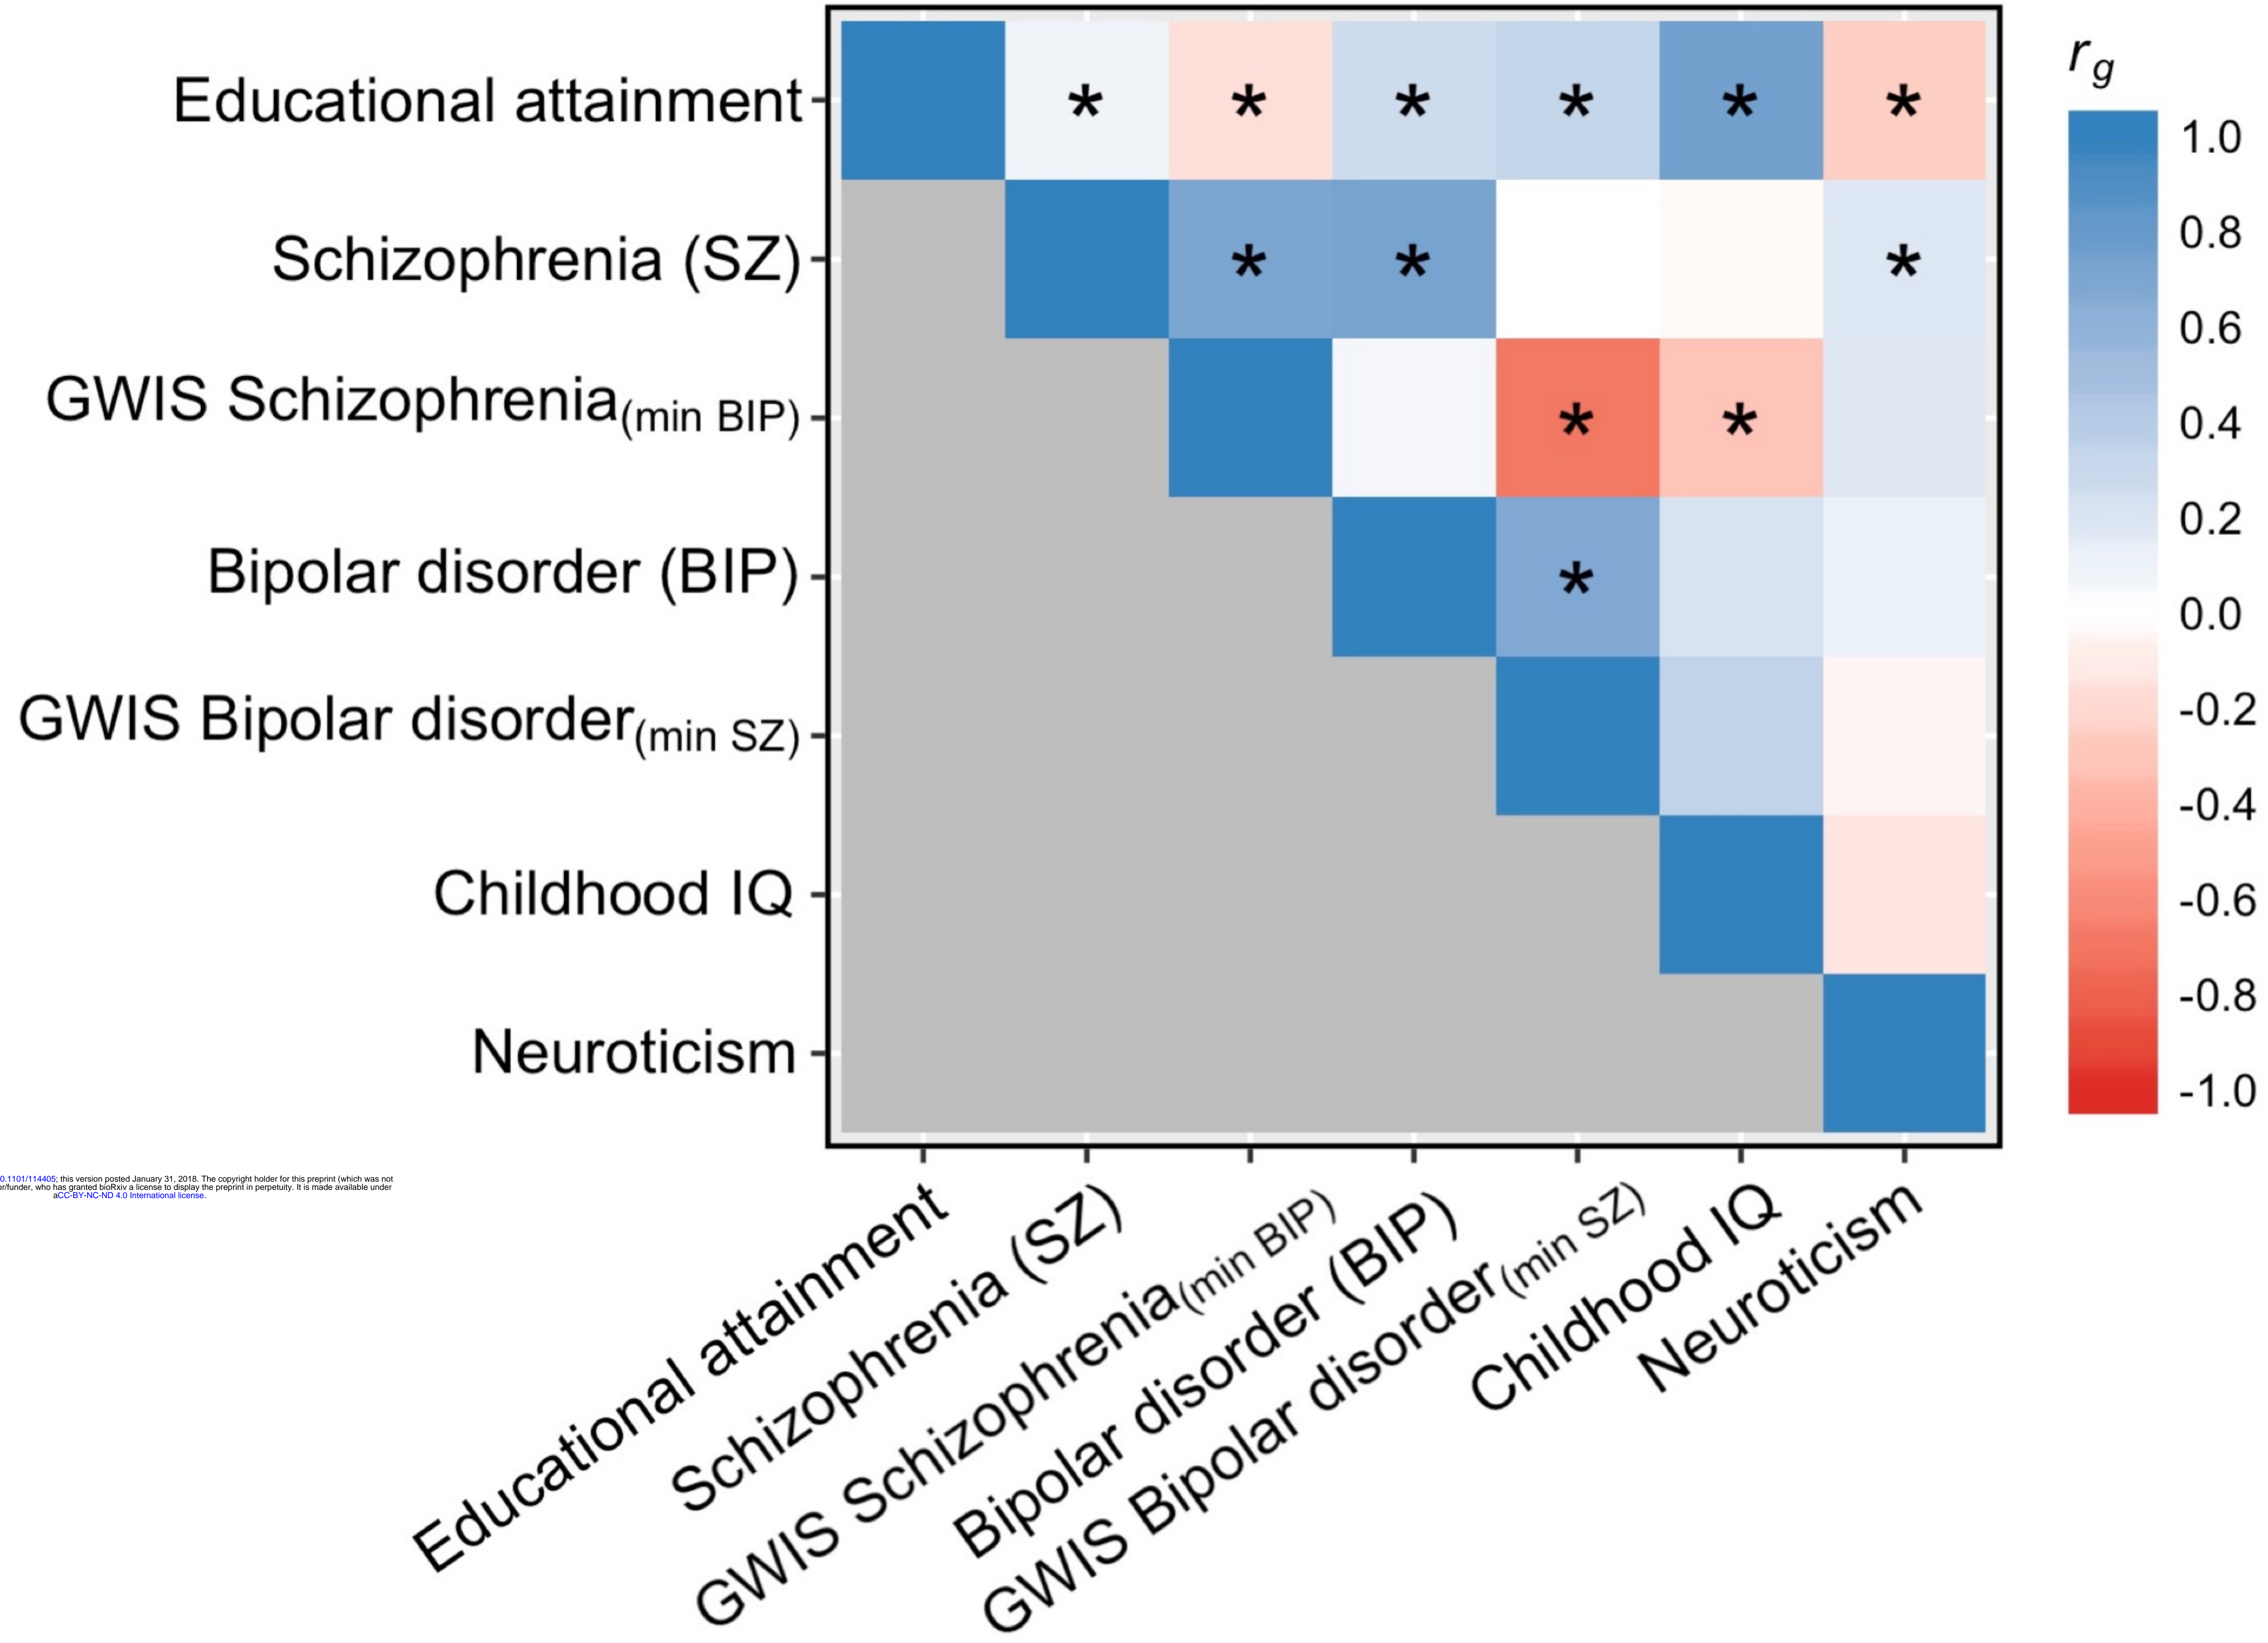

bioRxiv preprint doi: <https://doi.org/10.1101/114405>; this version posted January 31, 2018. The copyright holder for this preprint (which was not certified by peer review) is the author/funder, who has granted bioRxiv a license to display the preprint in perpetuity. It is made available under aCC-BY-NC-ND 4.0 International license.
